# Supplementary material for: Proteomic Characterization of Colorectal Cancer Cells versus Normal-Derived Colon Mucosa Cells: Approaching Identification of Novel Diagnostic Protein Biomarkers in Colorectal Cancer
Source: MDPI journal article supplement (doi:10.3390/ijms21103466), 2020-05-14
Supplement: s1 [file s1]

## Legend

**Supplementary Figure 1.** Bioinformatic analysis of differentially expressed proteins in HCT 116 cells versus NCM460 cells obtained by LFQ LC-MS/MS. STRING v11.0 was used to analyze the differentially expressed 901 genes listed in Supplementary Table 1 (899 were recognized by STRING). The proteins have significantly more interactions (7610 edges) than the expected 5050 ( $p < 1 \times 10^{-16}$ ). The analysis indicated that the proteins are at least partially biologically related. Details are given in the text.
