# Supplementary material for: Proteomic Characterization of Colorectal Cancer Cells versus Normal-Derived Colon Mucosa Cells: Approaching Identification of Novel Diagnostic Protein Biomarkers in Colorectal Cancer
Source: Int J Mol Sci. 2020 May 14;21(10):3466. doi: 10.3390/ijms21103466 (PMC7278953; doi:10.3390/ijms21103466)
Supplement: Supplementary file 1 [file ijms-21-03466-s001.zip › Supplementary Table 1.xlsx]

## Sheet: Sheet1
=-LOG(P-value)	Log2(HCT116/NCM460)	Protein IDs	Majority protein IDs	Protein names	Gene names
9.88534	-1.47017	Q15118;Q15118-2	Q15118;Q15118-2	[Pyruvate dehydrogenase (acetyl-transferring)] kinase isozyme 1, mitochondrial	PDK1
6.37181	2.78426	Q04446	Q04446	1,4-alpha-glucan-branching enzyme	GBE1
2.41169	1.478	Q9NRX4;Q9NRX4-2	Q9NRX4	14 kDa phosphohistidine phosphatase	PHPT1
7.24313	1.17914	P62258;P62258-2	P62258;P62258-2	14-3-3 protein epsilon	YWHAE
6.26583	1.69511	Q04917	Q04917	14-3-3 protein eta	YWHAH
8.09147	2.20268	P31947;P31947-2	P31947;P31947-2	14-3-3 protein sigma	SFN
9.29183	1.46789	P63104;P63104-2	P63104;P63104-2	14-3-3 protein zeta/delta	YWHAZ
6.75359	-1.1549	Q9C0C2;Q9C0C2-2	Q9C0C2;Q9C0C2-2	182 kDa tankyrase-1-binding protein	TNKS1BP1
8.15096	1.54545	Q01970-2;Q01970	Q01970-2;Q01970	1-phosphatidylinositol 4,5-bisphosphate phosphodiesterase beta-3	PLCB3
NaN	Upregulated	P16885	P16885	1-phosphatidylinositol 4,5-bisphosphate phosphodiesterase gamma-2	PLCG2
7.6539	1.46345	Q6L8Q7-2;Q6L8Q7	Q6L8Q7-2;Q6L8Q7	2,5-phosphodiesterase 12	PDE12
6.07592	1.34415	P62191;P62191-2	P62191;P62191-2	26S protease regulatory subunit 4	PSMC1
7.47959	1.18891	P43686;P43686-2	P43686;P43686-2	26S protease regulatory subunit 6B	PSMC4
3.0434	1.43005	O00487	O00487	26S proteasome non-ATPase regulatory subunit 14	PSMD14
2.69314	1.27717	O75600;O75600-2	O75600;O75600-2	2-amino-3-ketobutyrate coenzyme A ligase, mitochondrial	GCAT
7.24855	1.40862	O43598;O43598-2	O43598;O43598-2	2-deoxynucleoside 5-phosphate N-hydrolase 1	DNPH1
3.83006	-1.08979	Q16880	Q16880	2-hydroxyacylsphingosine 1-beta-galactosyltransferase	UGT8
11.875	-2.43142	P12694;P12694-2	P12694;P12694-2	2-oxoisovalerate dehydrogenase subunit alpha, mitochondrial	BCKDHA
3.10901	-1.01749	Q9BRJ2	Q9BRJ2	39S ribosomal protein L45, mitochondrial	MRPL45
8.29939	-1.25902	Q99714;Q99714-2	Q99714;Q99714-2	3-hydroxyacyl-CoA dehydrogenase type-2	HSD17B10
7.62643	-1.37572	P31937	P31937	3-hydroxyisobutyrate dehydrogenase, mitochondrial	HIBADH
10.3996	-7.94237	P42765	P42765	3-ketoacyl-CoA thiolase, mitochondrial	ACAA2
9.98973	-1.63597	P09110;P09110-2	P09110;P09110-2	3-ketoacyl-CoA thiolase, peroxisomal	ACAA1
3.48814	1.02374	P25398	P25398	40S ribosomal protein S12	RPS12
2.35657	1.42571	P62269	P62269	40S ribosomal protein S18	RPS18
2.72256	1.00226	P39019	P39019	40S ribosomal protein S19	RPS19
4.04647	1.24604	P62857	P62857	40S ribosomal protein S28	RPS28
5.2291	1.30433	P62753	P62753	40S ribosomal protein S6	RPS6
4.0654	1.02833	P46781	P46781	40S ribosomal protein S9	RPS9
8.69551	1.03539	P08865	P08865	40S ribosomal protein SA	RPSA
NaN	Downregulated	Q96IR7	Q96IR7	4-hydroxyphenylpyruvate dioxygenase-like protein	HPDL
NaN	Upregulated	Q8IZH2;Q8IZH2-2;Q8IZH2-3	Q8IZH2;Q8IZH2-2	5-3 exoribonuclease 1	XRN1
7.82681	1.25151	P21589;P21589-2	P21589;P21589-2	5-nucleotidase	NT5E
4.65336	1.79183	Q5TFE4;Q5TFE4-2	Q5TFE4;Q5TFE4-2	5-nucleotidase domain-containing protein 1	NT5DC1
7.13971	1.75844	P10155-3;P10155-5;P10155-4;P10155;P10155-2	P10155-3;P10155-5;P10155-4;P10155;P10155-2	60 kDa SS-A/Ro ribonucleoprotein	TROVE2
5.16149	1.08132	P05386	P05386	60S acidic ribosomal protein P1	RPLP1
4.56777	1.12458	Q02543	Q02543	60S ribosomal protein L18a	RPL18A
8.40872	-2.01372	Q9UBM7	Q9UBM7	7-dehydrocholesterol reductase	DHCR7
2.91761	-1.43052	O95870;O95870-2	O95870;O95870-2	Abhydrolase domain-containing protein 16A	ABHD16A
6.10994	2.26809	Q9BTT0-3;Q9BTT0;Q9BTT0-2	Q9BTT0-3;Q9BTT0	Acidic leucine-rich nuclear phosphoprotein 32 family member E	ANP32E
2.69812	1.42822	Q9NZ32	Q9NZ32	Actin-related protein 10	ACTR10
2.89248	1.78025	Q9H1I8;Q9H1I8-3;Q9H1I8-2	Q9H1I8;Q9H1I8-3;Q9H1I8-2	Activating signal cointegrator 1 complex subunit 2	ASCC2
4.94154	2.03788	O95433-2;O95433	O95433-2;O95433	Activator of 90 kDa heat shock protein ATPase homolog 1	AHSA1
10.4641	-1.17141	Q9H2P0	Q9H2P0	Activity-dependent neuroprotector homeobox protein	ADNP
7.71008	-1.3239	Q9H845	Q9H845	Acyl-CoA dehydrogenase family member 9, mitochondrial	ACAD9
9.57126	-3.43525	Q96CM8-3;Q96CM8;Q96CM8-2;Q96CM8-4	Q96CM8-3;Q96CM8;Q96CM8-2;Q96CM8-4	Acyl-CoA synthetase family member 2, mitochondrial	ACSF2
6.76378	-3.55461	Q5T8D3-2;Q5T8D3-3;Q5T8D3;Q5T8D3-4	Q5T8D3-2;Q5T8D3-3;Q5T8D3;Q5T8D3-4	Acyl-CoA-binding domain-containing protein 5	ACBD5
6.52204	-3.77956	O14734	O14734	Acyl-coenzyme A thioesterase 8	ACOT8
4.26284	2.15701	Q9Y305-3;Q9Y305-2;Q9Y305;Q9Y305-4	Q9Y305-3;Q9Y305-2;Q9Y305;Q9Y305-4	Acyl-coenzyme A thioesterase 9, mitochondrial	ACOT9
2.41338	-1.88973	Q5T1C6	Q5T1C6	Acyl-coenzyme A thioesterase THEM4	THEM4
5.03419	1.50381	P46108;P46108-2	P46108;P46108-2	Adapter molecule crk	CRK
3.82087	2.00751	Q8NC96-2;Q8NC96	Q8NC96-2;Q8NC96	Adaptin ear-binding coat-associated protein 1	NECAP1
2.36565	1.2387	Q9NVZ3;Q9NVZ3-3;Q9NVZ3-2;Q9NVZ3-4	Q9NVZ3;Q9NVZ3-3;Q9NVZ3-2;Q9NVZ3-4	Adaptin ear-binding coat-associated protein 2	NECAP2
5.9554	1.25976	P07741;P07741-2	P07741;P07741-2	Adenine phosphoribosyltransferase	APRT
NaN	Upregulated	P00813	P00813	Adenosine deaminase	ADA
5.34168	1.72997	P00568	P00568	Adenylate kinase isoenzyme 1	AK1
5.97219	1.93426	P30566-2;P30566	P30566-2;P30566	Adenylosuccinate lyase	ADSL
5.56563	-2.13457	Q9HDC9;Q9HDC9-2	Q9HDC9;Q9HDC9-2	Adipocyte plasma membrane-associated protein	APMAP
6.16619	-2.82985	Q9BRR6-2;Q9BRR6;Q9BRR6-4;Q9BRR6-3;Q9BRR6-6;Q9BRR6-5	Q9BRR6-2;Q9BRR6	ADP-dependent glucokinase	ADPGK
6.42159	1.11945	Q9UKK9	Q9UKK9	ADP-sugar pyrophosphatase	NUDT5
NaN	Downregulated	O95154	O95154	Aflatoxin B1 aldehyde reductase member 3	AKR7A3
NaN	Downregulated	Q9BSE5	Q9BSE5	Agmatinase, mitochondrial	AGMAT
3.87273	-2.36696	Q92667;Q92667-2	Q92667;Q92667-2	A-kinase anchor protein 1, mitochondrial	AKAP1
3.19038	1.16696	Q9ULX6;Q9ULX6-2	Q9ULX6;Q9ULX6-2	A-kinase anchor protein 8-like	AKAP8L
9.02821	-4.81077	Q8TD30;Q8TD30-2;P24298	Q8TD30;Q8TD30-2	Alanine aminotransferase 2	GPT2
6.61682	1.09794	Q9BTE6;Q9BTE6-2;Q9BTE6-3	Q9BTE6;Q9BTE6-2;Q9BTE6-3	Alanyl-tRNA editing protein Aarsd1	AARSD1
9.30091	1.09351	P14550	P14550	Alcohol dehydrogenase [NADP(+)]	AKR1A1
9.37635	1.38498	P11766	P11766	Alcohol dehydrogenase class-3	ADH5
10.2364	-2.40775	P05091;P05091-2	P05091;P05091-2	Aldehyde dehydrogenase, mitochondrial	ALDH2
NaN	Downregulated	O60218;C9JRZ8;C9JRZ8-2	O60218	Aldo-keto reductase family 1 member B10	AKR1B10
NaN	Downregulated	P42330;P42330-2;P17516	P42330;P42330-2	Aldo-keto reductase family 1 member C3	AKR1C3
5.69714	1.96028	Q96IU4;Q96IU4-2	Q96IU4	Alpha/beta hydrolase domain-containing protein 14B	ABHD14B
NaN	Downregulated	Q9UQ53-2;Q9UQ53;Q9UQ53-3	Q9UQ53-2;Q9UQ53;Q9UQ53-3	Alpha-1,3-mannosyl-glycoprotein 4-beta-N-acetylglucosaminyltransferase B	MGAT4B
NaN	Downregulated	P01009;P01009-2;P01009-3	P01009;P01009-2;P01009-3	Alpha-1-antitrypsin;Short peptide from AAT	SERPINA1
9.62968	-1.50743	P35611-2;P35611-6;P35611-4;P35611;P35611-3;P35611-5	P35611-2;P35611-6;P35611-4;P35611;P35611-3;P35611-5	Alpha-adducin	ADD1
7.71522	1.10312	P06733;P06733-2;P13929-3;P13929-2;P13929	P06733;P06733-2	Alpha-enolase	ENO1
3.85106	1.38629	Q12800-2;Q12800-3;Q12800-4;Q12800	Q12800-2;Q12800-3;Q12800-4;Q12800	Alpha-globin transcription factor CP2	TFCP2
5.48753	-1.2878	Q16706	Q16706	Alpha-mannosidase 2	MAN2A1
4.84593	-1.04854	P54802	P54802	Alpha-N-acetylglucosaminidase;Alpha-N-acetylglucosaminidase 82 kDa form;Alpha-N-acetylglucosaminidase 77 kDa form	NAGLU
6.22259	-2.74984	P54920;Q9H115-3;Q9H115-2;Q9H115	P54920	Alpha-soluble NSF attachment protein	NAPA
3.60091	2.1278	Q06203	Q06203	Amidophosphoribosyltransferase	PPAT
NaN	Downregulated	P19801;P19801-2	P19801;P19801-2	Amiloride-sensitive amine oxidase [copper-containing]	AOC1
5.80716	1.85674	P27338;P27338-2	P27338;P27338-2	Amine oxidase [flavin-containing] B	MAOB
1.92716	-1.04326	Q03154-2;Q03154-3;Q03154;Q03154-4	Q03154-2;Q03154-3;Q03154;Q03154-4	Aminoacylase-1	ACY1
1.92945	-1.54418	Q5IS80;P05067-10;P05067-3;P05067-4;P05067-5;P05067-6;P05067-7;P05067-11;P05067-8;P05067-9;P05067;P05067-2	Q5IS80;P05067-10;P05067-3;P05067-4;P05067-5;P05067-6;P05067-7;P05067-11;P05067-8;P05067-9;P05067	Amyloid beta A4 protein;N-APP;Soluble APP-alpha;Soluble APP-beta;C99;Beta-amyloid protein 42;Beta-amyloid protein 40;C83;P3(42);P3(40);C80;Gamma-secretase C-terminal fragment 59;Gamma-secretase C-terminal fragment 57;Gamma-secretase C-terminal fragment 50;C31	APP
2.00239	-1.91698	P04920;P04920-2;P04920-3	P04920;P04920-2;P04920-3	Anion exchange protein 2	SLC4A2
13.8845	2.40951	P04083	P04083	Annexin A1	ANXA1
NaN	Downregulated	Q9UJ72	Q9UJ72	Annexin A10	ANXA10
10.2641	1.48339	P12429	P12429	Annexin A3	ANXA3
NaN	Upregulated	P08133;P08133-2	P08133;P08133-2	Annexin A6	ANXA6
NaN	Downregulated	O76027	O76027	Annexin A9	ANXA9
NaN	Downregulated	Q9NW15;Q9NW15-2;Q9NW15-5;Q9NW15-4;Q9NW15-3	Q9NW15;Q9NW15-2;Q9NW15-5;Q9NW15-4;Q9NW15-3	Anoctamin-10	ANO10
7.32032	-9.44989	O95994	O95994	Anterior gradient protein 2 homolog	AGR2
2.89215	1.16941	Q9BXS5;Q9BXS5-2	Q9BXS5;Q9BXS5-2	AP-1 complex subunit mu-1	AP1M1
2.83669	1.22485	O00203-3;O00203;Q13367;Q13367-4;Q13367-3	O00203-3;O00203	AP-3 complex subunit beta-1	AP3B1
6.05948	1.26521	O14617;O14617-5;O14617-4;O14617-2;O14617-3	O14617;O14617-5;O14617-4;O14617-2;O14617-3	AP-3 complex subunit delta-1	AP3D1
12.2682	-1.24456	O95831-3;O95831;O95831-6;O95831-4;O95831-2;O95831-5	O95831-3;O95831;O95831-6;O95831-4;O95831-2	Apoptosis-inducing factor 1, mitochondrial	AIFM1
3.84333	-1.38609	O43150-2;O43150	O43150-2;O43150	Arf-GAP with SH3 domain, ANK repeat and PH domain-containing protein 2	ASAP2
3.49689	1.33341	P00966	P00966	Argininosuccinate synthase	ASS1
NaN	Upregulated	O95260-2;O95260	O95260-2;O95260	Arginyl-tRNA--protein transferase 1	ATE1
5.65762	-2.21511	Q9UH62	Q9UH62	Armadillo repeat-containing X-linked protein 3	ARMCX3
9.13789	1.39599	P17174;P17174-2	P17174;P17174-2	Aspartate aminotransferase, cytoplasmic	GOT1
3.3862	1.11388	Q9UBB4-2;Q9UBB4	Q9UBB4-2;Q9UBB4	Ataxin-10	ATXN10
4.24289	-2.46883	Q9NP58-4;Q9NP58	Q9NP58-4;Q9NP58	ATP-binding cassette sub-family B member 6, mitochondrial	ABCB6
5.10565	-1.22439	P28288;P28288-2;P28288-3	P28288;P28288-2	ATP-binding cassette sub-family D member 3	ABCD3
5.5189	1.42545	P61221	P61221	ATP-binding cassette sub-family E member 1	ABCE1
NaN	Downregulated	Q9UNQ0-2;Q9UNQ0	Q9UNQ0-2;Q9UNQ0	ATP-binding cassette sub-family G member 2	ABCG2
10.9528	1.38417	Q01813;Q01813-2	Q01813;Q01813-2	ATP-dependent 6-phosphofructokinase, platelet type	PFKP
4.34448	-1.11358	Q9BQ39	Q9BQ39	ATP-dependent RNA helicase DDX50	DDX50
5.03373	2.01971	O95817	O95817	BAG family molecular chaperone regulator 3	BAG3
NaN	Upregulated	O95429-2;O95429	O95429-2;O95429	BAG family molecular chaperone regulator 4	BAG4
4.89631	2.71178	Q9UL15;Q9UL15-2	Q9UL15;Q9UL15-2	BAG family molecular chaperone regulator 5	BAG5
3.40196	-1.27543	Q9HCM4-2;Q9HCM4-4;Q9HCM4-3;Q9HCM4	Q9HCM4-2;Q9HCM4-4;Q9HCM4-3;Q9HCM4	Band 4.1-like protein 5	EPB41L5
6.04788	-3.05468	P50895	P50895	Basal cell adhesion molecule	BCAM
4.79296	1.78374	Q7L1Q6-4;Q7L1Q6;Q7L1Q6-3;Q7L1Q6-2	Q7L1Q6-4;Q7L1Q6;Q7L1Q6-3;Q7L1Q6-2	Basic leucine zipper and W2 domain-containing protein 1	BZW1
2.19362	1.147	Q9BXK5;Q9BXK5-4;Q9BXK5-2	Q9BXK5;Q9BXK5-4	Bcl-2-like protein 13	BCL2L13
11.8252	-1.53178	P16278;P16278-3;P16278-2	P16278;P16278-3;P16278-2	Beta-galactosidase	GLB1
11.2876	-2.72801	P06865	P06865	Beta-hexosaminidase subunit alpha	HEXA
6.91639	-1.32805	Q53H82	Q53H82	Beta-lactamase-like protein 2	LACTB2
6.44983	-1.58927	O00462	O00462	Beta-mannosidase	MANBA
4.61873	1.51035	O43252	O43252	Bifunctional 3-phosphoadenosine 5-phosphosulfate synthase 1;Sulfate adenylyltransferase;Adenylyl-sulfate kinase	PAPSS1
5.25577	1.66227	Q6NYC1-2;Q6NYC1;Q6NYC1-3	Q6NYC1-2;Q6NYC1;Q6NYC1-3	Bifunctional arginine demethylase and lysyl-hydroxylase JMJD6	JMJD6
5.68331	2.51353	Q13867	Q13867	Bleomycin hydrolase	BLMH
NaN	Upregulated	Q6PJG6;Q6PJG6-3;Q6PJG6-2	Q6PJG6	BRCA1-associated ATM activator 1	BRAT1
8.85753	1.09169	Q9P287;Q9P287-3;Q9P287-4;Q9P287-2	Q9P287;Q9P287-3;Q9P287-4;Q9P287-2	BRCA2 and CDKN1A-interacting protein	BCCIP
NaN	Downregulated	O75363;O75363-2	O75363;O75363-2	Breast carcinoma-amplified sequence 1	BCAS1
3.55672	-1.04649	Q9Y6D5	Q9Y6D5	Brefeldin A-inhibited guanine nucleotide-exchange protein 2	ARFGEF2
5.93557	1.62306	P25440;P25440-2;P25440-4;P25440-3	P25440;P25440-2;P25440-4;P25440-3	Bromodomain-containing protein 2	BRD2
7.71659	2.8722	P22223-2;P22223	P22223-2;P22223	Cadherin-3	CDH3
NaN	Downregulated	Q96BS2;Q96BS2-2;Q96BS2-3	Q96BS2;Q96BS2-2	Calcineurin B homologous protein 3	TESC
1.4131	-1.14707	Q8NE86-3;Q8NE86;Q8NE86-2	Q8NE86-3;Q8NE86;Q8NE86-2	Calcium uniporter protein, mitochondrial	MCU
10.0317	-3.3012	Q9UJS0;Q9UJS0-2	Q9UJS0;Q9UJS0-2	Calcium-binding mitochondrial carrier protein Aralar2	SLC25A13
9.24188	-1.25802	Q6NUK1;Q6NUK1-2	Q6NUK1;Q6NUK1-2	Calcium-binding mitochondrial carrier protein SCaMC-1	SLC25A24
3.75321	1.4646	Q9Y376	Q9Y376	Calcium-binding protein 39	CAB39
NaN	Downregulated	Q9NP80-3;Q9NP80-2;Q9NP80	Q9NP80-3;Q9NP80-2;Q9NP80	Calcium-independent phospholipase A2-gamma	PNPLA8
NaN	Downregulated	O75185;O75185-3;O75185-2	O75185;O75185-3;O75185-2	Calcium-transporting ATPase type 2C member 2	ATP2C2
9.75166	1.48803	Q9HB71;Q9HB71-3;Q9HB71-2	Q9HB71;Q9HB71-3	Calcyclin-binding protein	CACYBP
9.34735	-1.00512	P27824-2;P27824;P27824-3	P27824-2;P27824;P27824-3	Calnexin	CANX
10.2355	1.32137	P17655;P17655-2	P17655;P17655-2	Calpain-2 catalytic subunit	CAPN2
NaN	Upregulated	Q15417;Q15417-2;Q15417-3	Q15417;Q15417-2;Q15417-3	Calponin-3	CNN3
6.92143	3.3134	P10644;P10644-2	P10644;P10644-2	cAMP-dependent protein kinase type I-alpha regulatory subunit;cAMP-dependent protein kinase type I-alpha regulatory subunit, N-terminally processed	PRKAR1A
4.67618	-1.06993	Q9BSD7	Q9BSD7	Cancer-related nucleoside-triphosphatase	NTPCR
2.63533	1.49257	Q14444-2;Q14444	Q14444-2;Q14444	Caprin-1	CAPRIN1
6.5673	-3.06245	P23786	P23786	Carnitine O-palmitoyltransferase 2, mitochondrial	CPT2
7.15886	1.84108	P19784	P19784	Casein kinase II subunit alpha	CSNK2A2
3.54799	1.17807	P67870	P67870	Casein kinase II subunit beta	CSNK2B
7.4216	-1.54161	Q9H078-2;Q9H078-3;Q9H078;Q9H078-5;Q9H078-4	Q9H078-2;Q9H078-3;Q9H078;Q9H078-5;Q9H078-4	Caseinolytic peptidase B protein homolog	CLPB
8.44013	1.87835	Q9BXW7;Q9BXW7-2	Q9BXW7;Q9BXW7-2	Cat eye syndrome critical region protein 5	CECR5
6.4088	-1.54581	P21964-2;P21964	P21964-2;P21964	Catechol O-methyltransferase	COMT
12.5756	-2.43768	P07339	P07339	Cathepsin D;Cathepsin D light chain;Cathepsin D heavy chain	CTSD
NaN	Upregulated	P51636-2;P51636	P51636-2;P51636	Caveolin-2	CAV2
6.28596	-1.46946	Q03701	Q03701	CCAAT/enhancer-binding protein zeta	CEBPZ
NaN	Upregulated	Q6YHK3-4;Q6YHK3;Q6YHK3-2;Q6YHK3-3	Q6YHK3-4;Q6YHK3;Q6YHK3-2	CD109 antigen	CD109
5.64243	2.53441	Q13740;Q13740-2;Q13740-3	Q13740;Q13740-2;Q13740-3	CD166 antigen	ALCAM
4.84178	1.01379	O95400	O95400	CD2 antigen cytoplasmic tail-binding protein 2	CD2BP2
NaN	Downregulated	P04637-5;P04637-6;P04637-2;P04637-3;P04637-4;P04637;P04637-8;P04637-9;P04637-7	P04637-5;P04637-6;P04637-2;P04637-3;P04637-4;P04637;P04637-8;P04637-9;P04637-7	Cellular tumor antigen p53	TP53
3.21242	1.31182	Q9NZZ3;Q9NZZ3-2	Q9NZZ3;Q9NZZ3-2	Charged multivesicular body protein 5	CHMP5
3.21174	-1.04389	Q9P2M7;Q9P2M7-2	Q9P2M7;Q9P2M7-2	Cingulin	CGN
6.1365	1.08385	Q8N0X4;Q8N0X4-2	Q8N0X4;Q8N0X4-2	Citrate lyase subunit beta-like protein, mitochondrial	CLYBL
2.7286	-1.09769	Q96KA5-2;Q96KA5	Q96KA5-2;Q96KA5	Cleft lip and palate transmembrane protein 1-like protein	CLPTM1L
1.96218	1.09779	Q7Z460;Q7Z460-2;Q7Z460-4;Q7Z460-5;Q7Z460-3	Q7Z460;Q7Z460-2;Q7Z460-4;Q7Z460-5;Q7Z460-3	CLIP-associating protein 1	CLASP1
4.58538	1.48385	O75153	O75153	Clustered mitochondria protein homolog	CLUH
4.62497	1.46825	Q14019	Q14019	Coactosin-like protein	COTL1
NaN	Downregulated	P12259	P12259	Coagulation factor V;Coagulation factor V heavy chain;Coagulation factor V light chain	F5
7.34369	-2.83046	Q96EY8	Q96EY8	Cob(I)yrinic acid a,c-diamide adenosyltransferase, mitochondrial	MMAB
4.02423	-1.25383	Q8N3U4;Q8N3U4-2	Q8N3U4;Q8N3U4-2	Cohesin subunit SA-2	STAG2
NaN	Upregulated	P12109	P12109	Collagen alpha-1(VI) chain	COL6A1
2.13075	-1.25579	Q96JB2;Q96JB2-2	Q96JB2;Q96JB2-2	Conserved oligomeric Golgi complex subunit 3	COG3
6.45678	-1.11827	Q99829	Q99829	Copine-1	CPNE1
5.66285	4.0285	O75131;Q9HCH3-2;Q8IYJ1;O95741;O95741-2	O75131	Copine-3	CPNE3
NaN	Upregulated	Q9UBL6-2;Q9UBL6	Q9UBL6-2;Q9UBL6	Copine-7	CPNE7
8.00972	-1.6768	O75367-2;O75367-3;O75367	O75367-2;O75367-3;O75367	Core histone macro-H2A.1	H2AFY
4.47818	-1.22962	Q9BR76	Q9BR76	Coronin-1B	CORO1B
NaN	Upregulated	Q53ET0	Q53ET0	CREB-regulated transcription coactivator 2	CRTC2
NaN	Downregulated	O94886	O94886	CSC1-like protein 1	TMEM63A
7.35592	2.99682	Q9H5V8;Q9H5V8-2;Q9H5V8-3	Q9H5V8;Q9H5V8-2	CUB domain-containing protein 1	CDCP1
6.60585	1.38387	P06493;P06493-2;P11802-2;Q96Q40-6;Q96Q40-4;Q96Q40-3;O94921-3;Q96Q40-5;Q96Q40;O94921-2;O94921;Q07002;Q07002-3	P06493;P06493-2	Cyclin-dependent kinase 1	CDK1
2.51166	1.10528	P24941-2;P24941	P24941-2;P24941	Cyclin-dependent kinase 2	CDK2
3.47787	1.03685	O14976-2;O14976	O14976-2;O14976	Cyclin-G-associated kinase	GAK
1.77002	1.1265	O60563	O60563	Cyclin-T1	CCNT1
5.56196	1.52401	Q9UHD1;Q9UHD1-2	Q9UHD1;Q9UHD1-2	Cysteine and histidine-rich domain-containing protein 1	CHORDC1
6.70609	1.36621	Q9Y4P1-6;Q9Y4P1;Q9Y4P1-2;Q9Y4P1-3;Q9Y4P1-4	Q9Y4P1-6;Q9Y4P1;Q9Y4P1-2;Q9Y4P1-3;Q9Y4P1-4	Cysteine protease ATG4B	ATG4B
8.23235	1.94414	O43169	O43169	Cytochrome b5 type B	CYB5B
5.64264	-2.28022	Q6UW02;Q6UW02-2	Q6UW02;Q6UW02-2	Cytochrome P450 20A1	CYP20A1
8.64031	1.09767	P21399	P21399	Cytoplasmic aconitate hydratase	ACO1
2.72945	1.49565	Q13409-2;Q13409;Q13409-3;Q13409-7;Q13409-5;Q13409-6	Q13409-2;Q13409;Q13409-3;Q13409-7;Q13409-5;Q13409-6	Cytoplasmic dynein 1 intermediate chain 2	DYNC1I2
8.29209	2.55792	O00154-4;O00154-6;O00154-5;O00154-7;O00154;O00154-2;O00154-3	O00154-4;O00154-6;O00154-5;O00154-7;O00154;O00154-2;O00154-3	Cytosolic acyl coenzyme A thioester hydrolase	ACOT7
3.72668	1.65488	Q9Y5Y2	Q9Y5Y2	Cytosolic Fe-S cluster assembly factor NUBP2	NUBP2
2.81559	1.28925	P49902-2;P49902	P49902-2;P49902	Cytosolic purine 5-nucleotidase	NT5C2
5.78309	-2.9314	Q02338	Q02338	D-beta-hydroxybutyrate dehydrogenase, mitochondrial	BDH1
7.81307	-1.36442	Q5BKZ1-3;Q5BKZ1	Q5BKZ1-3;Q5BKZ1	DBIRD complex subunit ZNF326	ZNF326
7.34352	1.38724	P30046;P30046-2;A6NHG4	P30046;P30046-2;A6NHG4	D-dopachrome decarboxylase;D-dopachrome decarboxylase-like protein	DDT;DDTL
NaN	Upregulated	Q9H7D0;Q9H7D0-2	Q9H7D0	Dedicator of cytokinesis protein 5	DOCK5
5.36502	1.67448	Q96N67-4;Q96N67-3;Q96N67-5;Q96N67-2;Q96N67-6;Q96N67;Q96N67-7	Q96N67-4;Q96N67-3;Q96N67-5;Q96N67-2;Q96N67-6;Q96N67	Dedicator of cytokinesis protein 7	DOCK7
3.42472	-1.55716	Q8NDZ4;Q8NDZ4-2	Q8NDZ4;Q8NDZ4-2	Deleted in autism protein 1	C3orf58
3.80405	-1.61227	Q15392-2;Q15392	Q15392-2;Q15392	Delta(24)-sterol reductase	DHCR24
11.4457	-2.32971	Q13011	Q13011	Delta(3,5)-Delta(2,4)-dienoyl-CoA isomerase, mitochondrial	ECH1
NaN	Upregulated	Q9BU89	Q9BU89	Deoxyhypusine hydroxylase	DOHH
7.14289	-1.50151	Q9BUN8-2;Q9BUN8	Q9BUN8-2;Q9BUN8	Derlin-1	DERL1
1.98243	-1.29787	Q9NR28-2;Q9NR28;Q9NR28-3	Q9NR28-2;Q9NR28;Q9NR28-3	Diablo homolog, mitochondrial	DIABLO
6.68755	3.41429	Q16555;Q16555-2	Q16555;Q16555-2	Dihydropyrimidinase-related protein 2	DPYSL2
3.99263	1.11875	Q8WVM0	Q8WVM0	Dimethyladenosine transferase 1, mitochondrial	TFB1M
10.2153	-2.92048	P53634	P53634	Dipeptidyl peptidase 1;Dipeptidyl peptidase 1 exclusion domain chain;Dipeptidyl peptidase 1 heavy chain;Dipeptidyl peptidase 1 light chain	CTSC
2.32117	1.643	Q86TI2-4;Q86TI2;Q86TI2-2	Q86TI2-4;Q86TI2;Q86TI2-2	Dipeptidyl peptidase 9	DPP9
6.60652	2.81222	Q96PD2;Q96PD2-2	Q96PD2;Q96PD2-2	Discoidin, CUB and LCCL domain-containing protein 2	DCBLD2
6.00139	-1.1307	O14672;O14672-2	O14672	Disintegrin and metalloproteinase domain-containing protein 10	ADAM10
6.80932	1.45814	P26358-2;P26358;P26358-3	P26358-2;P26358;P26358-3	DNA (cytosine-5)-methyltransferase 1	DNMT1
NaN	Upregulated	Q92466;Q92466-5;Q92466-4;Q92466-3;Q92466-2	Q92466;Q92466-5;Q92466-4	DNA damage-binding protein 2	DDB2
NaN	Upregulated	Q9NRW3	Q9NRW3	DNA dC->dU-editing enzyme APOBEC-3C	APOBEC3C
4.28183	-1.16357	P49916-3;P49916;P49916-4;P49916-2	P49916-3;P49916;P49916-4;P49916-2	DNA ligase 3	LIG3
3.67843	-1.00771	Q9NPF5	Q9NPF5	DNA methyltransferase 1-associated protein 1	DMAP1
2.37817	-1.04161	P28340	P28340	DNA polymerase delta catalytic subunit	POLD1
1.80483	1.23409	Q01831;Q01831-2	Q01831;Q01831-2	DNA repair protein complementing XP-C cells	XPC
6.57429	1.14052	Q13426;Q13426-2;Q13426-3	Q13426;Q13426-2;Q13426-3	DNA repair protein XRCC4	XRCC4
9.32651	-2.20406	P11388;P11388-2;P11388-3;P11388-4	P11388;P11388-2;P11388-3;P11388-4	DNA topoisomerase 2-alpha	TOP2A
4.13403	-1.50481	Q02880-2;Q02880	Q02880-2;Q02880	DNA topoisomerase 2-beta	TOP2B
4.37758	3.16757	O00411	O00411	DNA-directed RNA polymerase, mitochondrial	POLRMT
7.77937	1.31624	P31689;P31689-2	P31689;P31689-2	DnaJ homolog subfamily A member 1	DNAJA1
8.30467	1.80076	P25685;P25685-2	P25685;P25685-2	DnaJ homolog subfamily B member 1	DNAJB1
9.01197	-1.52573	Q8IXB1;Q8IXB1-2;Q8IXB1-3	Q8IXB1;Q8IXB1-2;Q8IXB1-3	DnaJ homolog subfamily C member 10	DNAJC10
7.64619	-2.01144	Q13217	Q13217	DnaJ homolog subfamily C member 3	DNAJC3
4.40727	1.46443	Q99615;Q99615-2	Q99615;Q99615-2	DnaJ homolog subfamily C member 7	DNAJC7
7.2315	-1.17793	P46977;P46977-2	P46977;P46977-2	Dolichyl-diphosphooligosaccharide--protein glycosyltransferase subunit STT3A	STT3A
4.69672	-2.39518	Q9Y673;Q9Y673-2	Q9Y673;Q9Y673-2	Dolichyl-phosphate beta-glucosyltransferase	ALG5
5.74724	-4.18215	P49959-2;P49959;P49959-3	P49959-2;P49959;P49959-3	Double-strand break repair protein MRE11A	MRE11A
9.01854	1.7541	Q16643;Q16643-3;Q16643-2	Q16643;Q16643-3;Q16643-2	Drebrin	DBN1
3.62927	1.05948	O00429-4;O00429-5;O00429-3;O00429-9;O00429-2;O00429;O00429-8;O00429-6;O00429-7	O00429-4;O00429-5;O00429-3;O00429-9;O00429-2;O00429;O00429-8;O00429-6;O00429-7	Dynamin-1-like protein	DNM1L
NaN	Upregulated	Q6XZF7;Q6XZF7-2	Q6XZF7	Dynamin-binding protein	DNMBP
8.65402	-1.31567	O60313;O60313-2;O60313-13;O60313-9;O60313-11;O60313-10	O60313;O60313-2;O60313-13;O60313-9;O60313-11;O60313-10	Dynamin-like 120 kDa protein, mitochondrial;Dynamin-like 120 kDa protein, form S1	OPA1
8.9812	1.33616	Q86Y56;Q86Y56-2;Q86Y56-3	Q86Y56;Q86Y56-2	Dynein assembly factor 5, axonemal	DNAAF5
4.73373	3.56411	Q9C0C9	Q9C0C9	E2/E3 hybrid ubiquitin-protein ligase UBE2O	UBE2O
7.6261	1.31932	Q14258	Q14258	E3 ubiquitin/ISG15 ligase TRIM25	TRIM25
2.0143	1.02494	Q96J02-3;Q96J02-2;Q96J02	Q96J02-3;Q96J02-2;Q96J02	E3 ubiquitin-protein ligase Itchy homolog	ITCH
5.10765	1.60059	Q96T88;Q96T88-2	Q96T88;Q96T88-2	E3 ubiquitin-protein ligase UHRF1	UHRF1
5.5458	2.93481	O95834;O95834-2;O95834-3	O95834;O95834-2;O95834-3	Echinoderm microtubule-associated protein-like 2	EML2
7.96632	-3.5953	O75354-2;O75354-3;O75354	O75354-2;O75354-3;O75354	Ectonucleoside triphosphate diphosphohydrolase 6	ENTPD6
6.82624	1.42933	Q96C19;Q9BUP0-2;Q9BUP0	Q96C19	EF-hand domain-containing protein D2	EFHD2
5.14633	2.20267	Q8N3D4	Q8N3D4	EH domain-binding protein 1-like protein 1	EHBP1L1
5.41497	2.84504	Q9NZN4;Q9NZN4-2	Q9NZN4;Q9NZN4-2	EH domain-containing protein 2	EHD2
10.7219	-1.55313	P13804-2;P13804	P13804-2;P13804	Electron transfer flavoprotein subunit alpha, mitochondrial	ETFA
8.28886	-1.61781	P38117;P38117-2	P38117;P38117-2	Electron transfer flavoprotein subunit beta	ETFB
2.17326	1.07432	Q8IUD2-3;Q8IUD2;Q8IUD2-4;Q8IUD2-2;Q8IUD2-5	Q8IUD2-3;Q8IUD2;Q8IUD2-4;Q8IUD2-2	ELKS/Rab6-interacting/CAST family member 1	ERC1
8.54942	2.53726	Q05639	Q05639	Elongation factor 1-alpha 2	EEF1A2
11.1813	1.50374	P13639	P13639	Elongation factor 2	EEF2
7.11781	-2.11753	Q96RP9;Q96RP9-2	Q96RP9;Q96RP9-2	Elongation factor G, mitochondrial	GFM1
1.64769	1.00929	Q96FZ2	Q96FZ2	Embryonic stem cell-specific 5-hydroxymethylcytosine-binding protein	HMCES
3.16719	1.24937	Q14249	Q14249	Endonuclease G, mitochondrial	ENDOG
4.19276	-1.81923	P78549-3;P78549-2;P78549	P78549-3;P78549-2;P78549	Endonuclease III-like protein 1	NTHL1
7.0612	1.68276	Q99961;Q99961-2	Q99961	Endophilin-A2	SH3GL1
5.80463	-3.97796	Q9NZ08;Q9NZ08-2	Q9NZ08;Q9NZ08-2	Endoplasmic reticulum aminopeptidase 1	ERAP1
NaN	Downregulated	Q6P179-3;Q6P179;Q6P179-2;Q6P179-4	Q6P179-3;Q6P179	Endoplasmic reticulum aminopeptidase 2	ERAP2
6.41067	-2.29849	Q9UKM7	Q9UKM7	Endoplasmic reticulum mannosyl-oligosaccharide 1,2-alpha-mannosidase	MAN1B1
3.60751	-2.84853	Q7Z2K6;Q7Z2K6-2	Q7Z2K6	Endoplasmic reticulum metallopeptidase 1	ERMP1
7.69396	-1.07507	P30040;P30040-2	P30040	Endoplasmic reticulum resident protein 29	ERP29
7.22321	-1.61492	Q9BS26	Q9BS26	Endoplasmic reticulum resident protein 44	ERP44
5.94404	-2.80278	Q96AP7	Q96AP7	Endothelial cell-selective adhesion molecule	ESAM
7.70508	-2.0496	P30084	P30084	Enoyl-CoA hydratase, mitochondrial	ECHS1
4.63893	2.93646	Q92817;A8MZ36	Q92817	Envoplakin	EVPL
4.24798	-2.34421	P21709;P21709-3;P21709-2	P21709	Ephrin type-A receptor 1	EPHA1
10.1465	1.37352	P29317;P29317-2	P29317;P29317-2	Ephrin type-A receptor 2	EPHA2
NaN	Upregulated	P29323-2;P29323-3;P29323	P29323-2;P29323-3;P29323	Ephrin type-B receptor 2	EPHB2
8.59168	-2.15473	P54760;P54760-2;P54760-4;P54760-3	P54760;P54760-2	Ephrin type-B receptor 4	EPHB4
8.55394	-2.88312	P98172	P98172	Ephrin-B1	EFNB1
7.10339	2.29321	P00533;P00533-4;P00533-3;P00533-2	P00533;P00533-4;P00533-3	Epidermal growth factor receptor	EGFR
12.5956	-1.4678	P58107	P58107	Epiplakin	EPPK1
4.85916	-2.51738	P07099	P07099	Epoxide hydrolase 1	EPHX1
NaN	Downregulated	Q9BV94-2;Q9BV94	Q9BV94-2;Q9BV94	ER degradation-enhancing alpha-mannosidase-like protein 2	EDEM2
2.82503	-1.49695	Q9BZQ6;Q9BZQ6-2	Q9BZQ6;Q9BZQ6-2	ER degradation-enhancing alpha-mannosidase-like protein 3	EDEM3
8.03019	-1.34848	Q8N766-4;Q8N766-3;Q8N766-2;Q8N766	Q8N766-4;Q8N766-3;Q8N766-2;Q8N766	ER membrane protein complex subunit 1	EMC1
NaN	Downregulated	Q5J8M3;Q5J8M3-2;Q5J8M3-3	Q5J8M3;Q5J8M3-2	ER membrane protein complex subunit 4	EMC4
4.89694	-2.30837	Q9NPA0	Q9NPA0	ER membrane protein complex subunit 7	EMC7
4.06441	-1.09668	O43402	O43402	ER membrane protein complex subunit 8	EMC8
6.80299	-1.54752	Q9H501	Q9H501	ESF1 homolog	ESF1
NaN	Upregulated	B1AK53;B1AK53-2	B1AK53;B1AK53-2	Espin	ESPN
NaN	Downregulated	P37059	P37059	Estradiol 17-beta-dehydrogenase 2	HSD17B2
1.56343	-1.16949	Q9C0D9	Q9C0D9	Ethanolaminephosphotransferase 1	EPT1
5.93797	1.35142	Q9NTX5-2;Q9NTX5;Q9NTX5-6;Q9NTX5-3;Q9NTX5-5	Q9NTX5-2;Q9NTX5;Q9NTX5-6;Q9NTX5-3	Ethylmalonyl-CoA decarboxylase	ECHDC1
3.82731	-1.84783	P32519-2;P32519	P32519-2;P32519	ETS-related transcription factor Elf-1	ELF1
2.75755	1.03656	P41214;P41214-2	P41214;P41214-2	Eukaryotic translation initiation factor 2D	EIF2D
8.82491	1.16893	Q14152;Q14152-2	Q14152;Q14152-2	Eukaryotic translation initiation factor 3 subunit A	EIF3A
7.31308	1.00319	P55884;P55884-2	P55884;P55884-2	Eukaryotic translation initiation factor 3 subunit B	EIF3B
6.47738	1.09601	O15371;O15371-3;O15371-2	O15371;O15371-3;O15371-2	Eukaryotic translation initiation factor 3 subunit D	EIF3D
5.70566	1.24926	P60228	P60228	Eukaryotic translation initiation factor 3 subunit E	EIF3E
5.02208	1.12156	O00303	O00303	Eukaryotic translation initiation factor 3 subunit F	EIF3F
4.57077	1.52581	O75821	O75821	Eukaryotic translation initiation factor 3 subunit G	EIF3G
3.9984	1.33153	O15372	O15372	Eukaryotic translation initiation factor 3 subunit H	EIF3H
4.97909	1.2064	Q13347	Q13347	Eukaryotic translation initiation factor 3 subunit I	EIF3I
4.03662	-1.07339	O75822;O75822-3;O75822-2	O75822;O75822-3;O75822-2	Eukaryotic translation initiation factor 3 subunit J	EIF3J
4.98335	1.33325	Q9UBQ5;Q9UBQ5-2	Q9UBQ5;Q9UBQ5-2	Eukaryotic translation initiation factor 3 subunit K	EIF3K
9.68785	1.13667	Q9Y262-2;Q9Y262	Q9Y262-2;Q9Y262	Eukaryotic translation initiation factor 3 subunit L	EIF3L
8.18877	1.05443	Q7L2H7;Q7L2H7-2	Q7L2H7;Q7L2H7-2	Eukaryotic translation initiation factor 3 subunit M	EIF3M
6.62735	1.52272	P63241;P63241-2;Q6IS14;Q9GZV4	P63241;P63241-2;Q6IS14	Eukaryotic translation initiation factor 5A-1;Eukaryotic translation initiation factor 5A-1-like	EIF5A;EIF5AL1
4.79131	1.36078	Q9Y2L1;Q9Y2L1-2	Q9Y2L1;Q9Y2L1-2	Exosome complex exonuclease RRP44	DIS3
7.35878	1.34636	Q9UIA9	Q9UIA9	Exportin-7	XPO7
11.7787	-1.32793	Q9BSJ8-2;Q9BSJ8	Q9BSJ8-2;Q9BSJ8	Extended synaptotagmin-1	ESYT1
6.5365	-1.72575	Q86XX4-2;Q86XX4;Q86XX4-5;Q86XX4-4;Q86XX4-6	Q86XX4-2;Q86XX4	Extracellular matrix protein FRAS1	FRAS1
13.267	3.01697	P15311	P15311	Ezrin	EZR
9.26601	1.33492	Q9Y5B9	Q9Y5B9	FACT complex subunit SPT16	SUPT16H
8.60149	1.27791	Q08945	Q08945	FACT complex subunit SSRP1	SSRP1
2.50266	-1.30265	Q8NFF5-2;Q8NFF5;Q8NFF5-3;Q8NFF5-4;Q8NFF5-5	Q8NFF5-2;Q8NFF5;Q8NFF5-3	FAD synthase;Molybdenum cofactor biosynthesis protein-like region;FAD synthase region	FLAD1
9.09791	1.13701	Q92945	Q92945	Far upstream element-binding protein 2	KHSRP
2.66307	1.5871	P14324-2;P14324	P14324-2;P14324	Farnesyl pyrophosphate synthase	FDPS
7.07623	7.76147	Q16658	Q16658	Fascin	FSCN1
14.3779	1.41511	P49327	P49327	Fatty acid synthase;[Acyl-carrier-protein] S-acetyltransferase;[Acyl-carrier-protein] S-malonyltransferase;3-oxoacyl-[acyl-carrier-protein] synthase;3-oxoacyl-[acyl-carrier-protein] reductase;3-hydroxyacyl-[acyl-carrier-protein] dehydratase;Enoyl-[acyl-carrier-protein] reductase;Oleoyl-[acyl-carrier-protein] hydrolase	FASN
7.70935	2.87799	Q01469;A8MUU1	Q01469	Fatty acid-binding protein, epidermal	FABP5
NaN	Downregulated	O00519	O00519	Fatty-acid amide hydrolase 1	FAAH
4.37751	-1.3784	Q9Y5Y0;Q9Y5Y0-2	Q9Y5Y0	Feline leukemia virus subgroup C receptor-related protein 1	FLVCR1
2.80172	-1.2406	Q9Y4F1;Q9Y4F1-2	Q9Y4F1;Q9Y4F1-2	FERM, RhoGEF and pleckstrin domain-containing protein 1	FARP1
NaN	Upregulated	Q96AC1-2;Q96AC1;Q96AC1-3	Q96AC1-2;Q96AC1;Q96AC1-3	Fermitin family homolog 2	FERMT2
5.64822	1.56505	P02792	P02792	Ferritin light chain	FTL
6.27452	1.24713	P22830;P22830-2	P22830;P22830-2	Ferrochelatase, mitochondrial	FECH
NaN	Upregulated	Q9Y613	Q9Y613	FH1/FH2 domain-containing protein 1	FHOD1
7.15401	1.59377	P30043	P30043	Flavin reductase (NADPH)	BLVRB
5.43239	-1.49175	O75955;O75955-2	O75955;O75955-2	Flotillin-1	FLOT1
7.1156	-1.69531	Q14254	Q14254	Flotillin-2	FLOT2
2.52409	1.03674	Q05397-7;Q05397;Q05397-2;Q05397-5;Q05397-6;Q05397-4;Q05397-3	Q05397-7;Q05397;Q05397-2;Q05397-5;Q05397-6	Focal adhesion kinase 1	PTK2
4.8372	1.15293	P51116	P51116	Fragile X mental retardation syndrome-related protein 2	FXR2
3.968	1.72156	Q9NQ88	Q9NQ88	Fructose-2,6-bisphosphatase TIGAR	TIGAR
7.17828	1.0795	P04075;P04075-2	P04075;P04075-2	Fructose-bisphosphate aldolase A	ALDOA
9.03223	1.41251	P09972	P09972	Fructose-bisphosphate aldolase C	ALDOC
9.80627	-1.00412	P07954-2;P07954	P07954-2;P07954	Fumarate hydratase, mitochondrial	FH
NaN	Upregulated	Q9BQS8;Q9BQS8-4;Q9BQS8-3;Q9BQS8-2	Q9BQS8;Q9BQS8-4	FYVE and coiled-coil domain-containing protein 1	FYCO1
NaN	Upregulated	P24385	P24385	G1/S-specific cyclin-D1	CCND1
9.99295	6.3685	P09382	P09382	Galectin-1	LGALS1
12.697	-2.55013	Q08380	Q08380	Galectin-3-binding protein	LGALS3BP
NaN	Downregulated	P56470	P56470	Galectin-4	LGALS4
4.78655	1.62155	P09104;P09104-2	P09104;P09104-2	Gamma-enolase	ENO2
8.8402	-2.31271	Q9H488;Q9H488-2	Q9H488;Q9H488-2	GDP-fucose protein O-fucosyltransferase 1	POFUT1
2.4744	-1.13575	Q9Y2G5;Q9Y2G5-1;Q9Y2G5-2	Q9Y2G5;Q9Y2G5-1;Q9Y2G5-2	GDP-fucose protein O-fucosyltransferase 2	POFUT2
NaN	Downregulated	O60547-2;O60547	O60547-2;O60547	GDP-mannose 4,6 dehydratase	GMDS
3.15032	1.04297	O14893-3;O14893-2;O14893	O14893-3;O14893-2;O14893	Gem-associated protein 2	GEMIN2
4.51655	1.559	P57678	P57678	Gem-associated protein 4	GEMIN4
7.13907	1.16976	Q8TEQ6	Q8TEQ6	Gem-associated protein 5	GEMIN5
4.21974	1.12565	P35269	P35269	General transcription factor IIF subunit 1	GTF2F1
2.41783	-1.50695	P32780;P32780-2	P32780;P32780-2	General transcription factor IIH subunit 1	GTF2H1
NaN	Upregulated	Q9H2C0	Q9H2C0	Gigaxonin	GAN
3.14081	2.11168	P60983;O60234	P60983	Glia maturation factor beta	GMFB
2.66668	1.91027	Q92990-2;Q92990	Q92990-2;Q92990	Glomulin	GLMN
NaN	Upregulated	Q8TDQ7-3;Q8TDQ7;Q8TDQ7-2;Q8TDQ7-5;Q8TDQ7-4	Q8TDQ7-3;Q8TDQ7;Q8TDQ7-2;Q8TDQ7-5;Q8TDQ7-4	Glucosamine-6-phosphate isomerase 2	GNPDA2
10.7871	-1.76747	P11413;P11413-3;P11413-2	P11413;P11413-3;P11413-2	Glucose-6-phosphate 1-dehydrogenase	G6PD
2.85035	1.10365	P48506	P48506	Glutamate--cysteine ligase catalytic subunit	GCLC
6.41569	1.04724	Q9BQ67	Q9BQ67	Glutamate-rich WD repeat-containing protein 1	GRWD1
NaN	Downregulated	Q6IA69-2;Q6IA69	Q6IA69-2;Q6IA69	Glutamine-dependent NAD(+) synthetase	NADSYN1
9.47935	-1.22329	Q06210-2;Q06210	Q06210-2;Q06210	Glutamine--fructose-6-phosphate aminotransferase [isomerizing] 1	GFPT1
4.69929	-1.07058	Q92947;Q92947-2	Q92947;Q92947-2	Glutaryl-CoA dehydrogenase, mitochondrial	GCDH
9.51263	1.96886	P00390-2;P00390;P00390-3;P00390-4;P00390-5	P00390-2;P00390;P00390-3;P00390-4;P00390-5	Glutathione reductase, mitochondrial	GSR
9.57739	-2.22173	Q9Y2Q3;Q9Y2Q3-4;Q9Y2Q3-3;Q9Y2Q3-2	Q9Y2Q3;Q9Y2Q3-4;Q9Y2Q3-3;Q9Y2Q3-2	Glutathione S-transferase kappa 1	GSTK1
4.88383	1.25878	P78417;P78417-3;P78417-2	P78417;P78417-3;P78417-2	Glutathione S-transferase omega-1	GSTO1
NaN	Upregulated	P0CG30;P0CG29	P0CG30;P0CG29	Glutathione S-transferase theta-2B;Glutathione S-transferase theta-2	GSTT2B;GSTT2
6.11965	1.15236	P04406;P04406-2;O14556	P04406;P04406-2	Glyceraldehyde-3-phosphate dehydrogenase	GAPDH
NaN	Upregulated	Q8N9F7;Q8N9F7-3;Q8N9F7-2	Q8N9F7;Q8N9F7-3;Q8N9F7-2	Glycerophosphodiester phosphodiesterase domain-containing protein 1	GDPD1
13.9689	-2.71475	P11216	P11216	Glycogen phosphorylase, brain form	PYGB
11.1971	2.38438	P06737-2;P06737	P06737-2;P06737	Glycogen phosphorylase, liver form	PYGL
4.10315	1.64723	P49840	P49840	Glycogen synthase kinase-3 alpha	GSK3A
4.81473	1.02086	P30419-2;P30419	P30419-2;P30419	Glycylpeptide N-tetradecanoyltransferase 1	NMT1
5.99345	2.27749	Q9HC38;Q9HC38-2;Q9HC38-3	Q9HC38;Q9HC38-2;Q9HC38-3	Glyoxalase domain-containing protein 4	GLOD4
NaN	Downregulated	O00461	O00461	Golgi integral membrane protein 4	GOLIM4
7.57522	-1.15515	Q08379;Q08379-2	Q08379;Q08379-2	Golgin subfamily A member 2	GOLGA2
7.99294	-1.31599	Q14789;Q14789-2;Q14789-3	Q14789;Q14789-2;Q14789-3	Golgin subfamily B member 1	GOLGB1
8.6785	-1.92231	Q96S52-2;Q96S52	Q96S52-2;Q96S52	GPI transamidase component PIG-S	PIGS
6.64207	-1.89141	Q92643;Q92643-2	Q92643	GPI-anchor transamidase	PIGK
NaN	Downregulated	Q3KR37-2;Q3KR37;Q3KR37-4;Q3KR37-3	Q3KR37-2;Q3KR37;Q3KR37-4;Q3KR37-3	GRAM domain-containing protein 1B	GRAMD1B
4.5754	2.36325	Q14C86-6;Q14C86-3;Q14C86-5;Q14C86-2;Q14C86;Q14C86-4	Q14C86-6;Q14C86-3;Q14C86-5;Q14C86-2;Q14C86;Q14C86-4	GTPase-activating protein and VPS9 domain-containing protein 1	GAPVD1
NaN	Upregulated	Q14353;Q14353-2	Q14353;Q14353-2	Guanidinoacetate N-methyltransferase	GAMT
5.38119	2.00504	P63096;P63096-2	P63096;P63096-2	Guanine nucleotide-binding protein G(i) subunit alpha-1	GNAI1
8.08832	1.29674	P63244	P63244	Guanine nucleotide-binding protein subunit beta-2-like 1;Guanine nucleotide-binding protein subunit beta-2-like 1, N-terminally processed	GNB2L1
3.96631	1.699	P36915;P36915-2	P36915;P36915-2	Guanine nucleotide-binding protein-like 1	GNL1
6.48118	-1.69896	Q9BSH5	Q9BSH5	Haloacid dehalogenase-like hydrolase domain-containing protein 3	HDHD3
8.20557	-1.65152	O00165-5;O00165;O00165-2;O00165-4;O00165-3;O00165-6	O00165-5;O00165;O00165-2;O00165-4;O00165-3	HCLS1-associated protein X-1	HAX1
8.8783	1.03794	P34932;P34932-2	P34932	Heat shock 70 kDa protein 4	HSPA4
12.251	3.08581	P04792	P04792	Heat shock protein beta-1	HSPB1
10.3002	1.892	P07900;P07900-2;Q14568;Q58FG0	P07900;P07900-2	Heat shock protein HSP 90-alpha	HSP90AA1
8.83282	1.45392	P08238;Q58FF7;Q58FG1	P08238	Heat shock protein HSP 90-beta	HSP90AB1
NaN	Upregulated	Q14527;Q14527-2	Q14527;Q14527-2	Helicase-like transcription factor	HLTF
5.39187	1.16769	Q9UK76;Q9UK76-2;Q9UK76-3	Q9UK76;Q9UK76-2;Q9UK76-3	Hematological and neurological expressed 1 protein;Hematological and neurological expressed 1 protein, N-terminally processed	HN1
NaN	Downregulated	P20823-3;P20823-2;P20823;P20823-7;P20823-5;P20823-6;P20823-4	P20823-3;P20823-2;P20823;P20823-7;P20823-5;P20823-6	Hepatocyte nuclear factor 1-alpha	HNF1A
NaN	Downregulated	Q9BQS7-2;Q9BQS7;Q9BQS7-3;Q9BQS7-4	Q9BQS7-2;Q9BQS7;Q9BQS7-3;Q9BQS7-4	Hephaestin	HEPH
7.82687	-1.00591	Q1KMD3	Q1KMD3	Heterogeneous nuclear ribonucleoprotein U-like protein 2	HNRNPUL2
4.40521	-1.10884	P30825;P52569;P52569-3	P30825	High affinity cationic amino acid transporter 1	SLC7A1
2.19995	1.18664	O15347	O15347	High mobility group protein B3	HMGB3
5.85431	-1.56435	Q9BX68	Q9BX68	Histidine triad nucleotide-binding protein 2, mitochondrial	HINT2
3.97471	-1.4952	Q92522	Q92522	Histone H1x	H1FX
5.29976	1.90512	Q86X55;Q86X55-1;Q86X55-2	Q86X55;Q86X55-1;Q86X55-2	Histone-arginine methyltransferase CARM1	CARM1
3.35555	-2.17277	Q03164-2;Q03164;Q03164-3	Q03164-2;Q03164;Q03164-3	Histone-lysine N-methyltransferase 2A;MLL cleavage product N320;MLL cleavage product C180	KMT2A
5.57655	1.02212	Q86TU7;Q86TU7-3;Q86TU7-2	Q86TU7;Q86TU7-3;Q86TU7-2	Histone-lysine N-methyltransferase setd3	SETD3
3.89216	2.56511	Q8WTS6	Q8WTS6	Histone-lysine N-methyltransferase SETD7	SETD7
NaN	Downregulated	Q93099	Q93099	Homogentisate 1,2-dioxygenase	HGD
3.9586	1.38679	P50502;Q8IZP2;Q8NFI4	P50502;Q8IZP2	Hsc70-interacting protein;Putative protein FAM10A4	ST13;ST13P4
8.29837	1.67447	Q16543	Q16543	Hsp90 co-chaperone Cdc37;Hsp90 co-chaperone Cdc37, N-terminally processed	CDC37
3.03404	1.18774	Q9NX55	Q9NX55	Huntingtin-interacting protein K	HYPK
5.96728	-1.97382	Q16836;Q16836-3;Q16836-2	Q16836;Q16836-3;Q16836-2	Hydroxyacyl-coenzyme A dehydrogenase, mitochondrial	HADH
8.17932	-1.36405	P35914;P35914-3;P35914-2	P35914;P35914-3;P35914-2	Hydroxymethylglutaryl-CoA lyase, mitochondrial	HMGCL
10.3765	-1.56272	Q6YN16;Q6YN16-2	Q6YN16;Q6YN16-2	Hydroxysteroid dehydrogenase-like protein 2	HSDL2
7.48656	1.05765	P00492	P00492	Hypoxanthine-guanine phosphoribosyltransferase	HPRT1
12.4249	-1.83554	Q9Y4L1;Q9Y4L1-2	Q9Y4L1;Q9Y4L1-2	Hypoxia up-regulated protein 1	HYOU1
NaN	Downregulated	P55899	P55899	IgG receptor FcRn large subunit p51	FCGRT
NaN	Downregulated	Q58DX5;Q58DX5-2	Q58DX5	Inactive N-acetylated-alpha-linked acidic dipeptidase-like protein 2	NAALADL2
NaN	Downregulated	Q96CC6	Q96CC6	Inactive rhomboid protein 1	RHBDF1
7.16411	-1.03066	Q9H2U2;Q9H2U2-2;Q9H2U2-3;Q9H2U2-6;Q9H2U2-4	Q9H2U2;Q9H2U2-2;Q9H2U2-3;Q9H2U2-6	Inorganic pyrophosphatase 2, mitochondrial	PPA2
11.2227	2.32639	P12268	P12268	Inosine-5-monophosphate dehydrogenase 2	IMPDH2
NaN	Downregulated	Q8IWB1	Q8IWB1	Inositol 1,4,5-trisphosphate receptor-interacting protein	ITPRIP
2.32963	1.2253	Q6P9B9	Q6P9B9	Integrator complex subunit 5	INTS5
6.5301	1.5718	P26006;P26006-1	P26006;P26006-1	Integrin alpha-3;Integrin alpha-3 heavy chain;Integrin alpha-3 light chain	ITGA3
8.50966	-1.34794	P06756-3;P06756;P06756-2	P06756-3;P06756;P06756-2	Integrin alpha-V;Integrin alpha-V heavy chain;Integrin alpha-V light chain	ITGAV
3.43919	1.63498	Q9H0C8	Q9H0C8	Integrin-linked kinase-associated serine/threonine phosphatase 2C	ILKAP
6.33444	-3.11799	P05362	P05362	Intercellular adhesion molecule 1	ICAM1
7.48929	3.29521	Q9H1B7	Q9H1B7	Interferon regulatory factor 2-binding protein-like	IRF2BPL
3.6592	-1.48312	P51617-2;P51617-3;P51617;P51617-4	P51617-2;P51617-3;P51617;P51617-4	Interleukin-1 receptor-associated kinase 1	IRAK1
8.60769	-2.42208	Q27J81;Q27J81-2;Q27J81-3	Q27J81;Q27J81-2	Inverted formin-2	INF2
6.30183	-2.60406	Q96AB3-2;Q96AB3;Q96AB3-3	Q96AB3-2;Q96AB3;Q96AB3-3	Isochorismatase domain-containing protein 2, mitochondrial	ISOC2
7.27133	-1.1099	O43837;O43837-2;O43837-3	O43837;O43837-2	Isocitrate dehydrogenase [NAD] subunit beta, mitochondrial	IDH3B
11.0919	-2.90183	P48735-2;P48735	P48735-2;P48735	Isocitrate dehydrogenase [NADP], mitochondrial	IDH2
8.95642	-2.20043	P26440-2;P26440	P26440-2;P26440	Isovaleryl-CoA dehydrogenase, mitochondrial	IVD
5.95305	-2.39435	Q92876;Q92876-2	Q92876;Q92876-2	Kallikrein-6	KLK6
4.57092	-2.24414	Q7Z4H8;Q7Z4H8-2;Q7Z4H8-3	Q7Z4H8;Q7Z4H8-2;Q7Z4H8-3	KDEL motif-containing protein 2	KDELC2
11.104	-2.00999	P05783;CON__H-INV:HIT000015463;CON__A2AB72;CON__O76013;CON__Q2M2I5;O76013-2;O76013;Q2M2I5	P05783	Keratin, type I cytoskeletal 18	KRT18
3.0097	1.65284	Q96EK5	Q96EK5	KIF1-binding protein	KIAA1279
6.04314	-2.71734	Q9NSK0;Q9NSK0-3;Q9NSK0-5;Q9NSK0-4	Q9NSK0;Q9NSK0-3;Q9NSK0-5	Kinesin light chain 4	KLC4
3.75893	1.12431	Q04760-2;Q04760	Q04760-2;Q04760	Lactoylglutathione lyase	GLO1
2.64462	-1.5538	Q14739	Q14739	Lamin-B receptor	LBR
NaN	Downregulated	Q16787-3;Q16787;Q16787-4;Q16787-1	Q16787-3;Q16787;Q16787-4;Q16787-1	Laminin subunit alpha-3	LAMA3
5.8662	-1.72218	P48449;P48449-2;P48449-3	P48449;P48449-2;P48449-3	Lanosterol synthase	LSS
2.56835	1.11694	Q92615	Q92615	La-related protein 4B	LARP4B
4.64857	-1.07819	Q9H089	Q9H089	Large subunit GTPase 1 homolog	LSG1
4.21944	-1.33078	Q14696	Q14696	LDLR chaperone MESD	MESDC2
6.98723	-1.63111	Q8NC56;Q8NC56-2	Q8NC56	LEM domain-containing protein 2	LEMD2
2.20323	2.45303	Q6P1M3;Q6P1M3-2;Q6P1M3-3	Q6P1M3;Q6P1M3-2	Lethal(2) giant larvae protein homolog 2	LLGL2
9.70574	1.47005	P09960;P09960-4;P09960-2;P09960-3	P09960;P09960-4;P09960-2;P09960-3	Leukotriene A-4 hydrolase	LTA4H
9.12224	-1.41657	Q9UHB6-2;Q9UHB6-5;Q9UHB6;Q9UHB6-4;Q9UHB6-3	Q9UHB6-2;Q9UHB6-5;Q9UHB6;Q9UHB6-4;Q9UHB6-3	LIM domain and actin-binding protein 1	LIMA1
4.10461	1.38823	P50851-2;P50851	P50851-2;P50851	Lipopolysaccharide-responsive and beige-like anchor protein	LRBA
7.73738	-3.18074	P33121-2;P33121-3;P33121	P33121-2;P33121-3;P33121	Long-chain-fatty-acid--CoA ligase 1	ACSL1
10.3308	-1.59135	O95573	O95573	Long-chain-fatty-acid--CoA ligase 3	ACSL3
6.46362	-2.07974	O60488-2;O60488	O60488-2;O60488	Long-chain-fatty-acid--CoA ligase 4	ACSL4
6.22275	1.24328	Q7Z4W1	Q7Z4W1	L-xylulose reductase	DCXR
NaN	Downregulated	O60449;O60449-3;O60449-2	O60449;O60449-3;O60449-2	Lymphocyte antigen 75	LY75
3.51261	-1.2645	Q9Y2K7;Q9Y2K7-3;Q9Y2K7-2;Q9Y2K7-4;Q9Y2K7-5	Q9Y2K7;Q9Y2K7-3;Q9Y2K7-2;Q9Y2K7-4;Q9Y2K7-5	Lysine-specific demethylase 2A	KDM2A
5.21223	1.77644	Q7LBC6;Q7LBC6-2;Q7LBC6-3	Q7LBC6;Q7LBC6-2	Lysine-specific demethylase 3B	KDM3B
3.22012	-1.94072	Q9NPH0-2;Q9NPH0	Q9NPH0-2;Q9NPH0	Lysophosphatidic acid phosphatase type 6	ACP6
5.47875	-1.26504	Q8NF37	Q8NF37	Lysophosphatidylcholine acyltransferase 1	LPCAT1
6.00572	-3.59595	Q7L5N7;Q7L5N7-2	Q7L5N7;Q7L5N7-2	Lysophosphatidylcholine acyltransferase 2	LPCAT2
9.3039	3.53698	P10253	P10253	Lysosomal alpha-glucosidase;76 kDa lysosomal alpha-glucosidase;70 kDa lysosomal alpha-glucosidase	GAA
5.25912	-2.11823	P10619-2;P10619	P10619-2;P10619	Lysosomal protective protein;Lysosomal protective protein 32 kDa chain;Lysosomal protective protein 20 kDa chain	CTSA
4.19164	1.14386	P42785;P42785-2	P42785;P42785-2	Lysosomal Pro-X carboxypeptidase	PRCP
4.26773	-1.90342	Q14108;Q14108-2	Q14108;Q14108-2	Lysosome membrane protein 2	SCARB2
3.18739	-2.1506	P13473;P13473-2;P13473-3	P13473;P13473-2;P13473-3	Lysosome-associated membrane glycoprotein 2	LAMP2
4.97628	-6.17521	P61626	P61626	Lysozyme C	LYZ
4.67441	1.50339	P14174	P14174	Macrophage migration inhibitory factor	MIF
8.11818	1.19489	P40925-3;P40925;P40925-2	P40925-3;P40925;P40925-2	Malate dehydrogenase, cytoplasmic	MDH1
3.39494	-1.16521	Q14165	Q14165	Malectin	MLEC
3.19038	-1.3063	O95822-2;O95822	O95822-2;O95822	Malonyl-CoA decarboxylase, mitochondrial	MLYCD
2.53891	-1.27706	O60476	O60476	Mannosyl-oligosaccharide 1,2-alpha-mannosidase IB	MAN1A2
2.76205	-1.16621	P49006	P49006	MARCKS-related protein	MARCKSL1
3.42182	-2.81432	P51511	P51511	Matrix metalloproteinase-15	MMP15
5.74835	-1.38186	Q5JRA6;Q5JRA6-2;Q5JRA6-4;Q5JRA6-3	Q5JRA6;Q5JRA6-2	Melanoma inhibitory activity protein 3	MIA3
6.09132	-1.25082	O00264	O00264	Membrane-associated progesterone receptor component 1	PGRMC1
3.61331	-2.26073	Q8NE01-2;Q8NE01-3;Q8NE01	Q8NE01-2;Q8NE01-3;Q8NE01	Metal transporter CNNM3	CNNM3
NaN	Downregulated	Q687X5;Q687X5-2	Q687X5;Q687X5-2	Metalloreductase STEAP4	STEAP4
1.59912	-1.23649	Q13505-3;Q13505;Q13505-2	Q13505-3;Q13505;Q13505-2	Metaxin-1	MTX1
9.0362	1.28208	P53582	P53582	Methionine aminopeptidase 1	METAP1
5.40966	2.61014	P50579;P50579-2;P50579-3	P50579;P50579-2;P50579-3	Methionine aminopeptidase 2	METAP2
7.60015	-3.32224	Q9HCC0;Q9HCC0-2	Q9HCC0;Q9HCC0-2	Methylcrotonoyl-CoA carboxylase beta chain, mitochondrial	MCCC2
5.82656	-4.21352	Q96RQ3	Q96RQ3	Methylcrotonoyl-CoA carboxylase subunit alpha, mitochondrial	MCCC1
5.89784	-1.80557	Q02252-2;Q02252	Q02252-2;Q02252	Methylmalonate-semialdehyde dehydrogenase [acylating], mitochondrial	ALDH6A1
4.54193	1.73815	Q9BQA1;Q9BQA1-2	Q9BQA1;Q9BQA1-2	Methylosome protein 50	WDR77
4.14012	1.07265	P54105	P54105	Methylosome subunit pICln	CLNS1A
2.06252	-1.54819	Q6UX53	Q6UX53	Methyltransferase-like protein 7B	METTL7B
6.02885	-2.13034	Q6UXV4	Q6UXV4	MICOS complex subunit MIC27	APOOL
6.27535	-1.40507	P10620;P10620-2	P10620;P10620-2	Microsomal glutathione S-transferase 1	MGST1
6.53036	1.98882	P27816-6;P27816;P27816-2;P27816-5;P27816-7	P27816-6;P27816;P27816-2	Microtubule-associated protein 4	MAP4
4.9283	1.76375	Q9NU22	Q9NU22	Midasin	MDN1
2.82889	-1.36064	Q8N183	Q8N183	Mimitin, mitochondrial	NDUFAF2
6.96941	-1.31411	Q7Z434;Q7Z434-4;Q7Z434-2;Q7Z434-5	Q7Z434;Q7Z434-4	Mitochondrial antiviral-signaling protein	MAVS
3.24093	-1.26816	Q9Y3D6	Q9Y3D6	Mitochondrial fission 1 protein	FIS1
2.15305	-1.60997	Q99797	Q99797	Mitochondrial intermediate peptidase	MIPEP
6.0695	-1.82929	O95563	O95563	Mitochondrial pyruvate carrier 2	MPC2
6.39027	-1.34081	Q8IXI1;Q8IXI1-2	Q8IXI1	Mitochondrial Rho GTPase 2	RHOT2
2.74502	-1.10496	O75648;O75648-4;O75648-2;O75648-5;O75648-3	O75648;O75648-4;O75648-2	Mitochondrial tRNA-specific 2-thiouridylase 1	TRMU
2.65945	1.03817	O95140;O95140-2	O95140	Mitofusin-2	MFN2
11.3964	1.3032	P28482-2;P28482	P28482-2;P28482	Mitogen-activated protein kinase 1	MAPK1
5.49944	-2.02687	Q8IVT2	Q8IVT2	Mitotic interactor and substrate of PLK1	MISP
3.87223	1.53405	Q9Y3D0	Q9Y3D0	Mitotic spindle-associated MMXD complex subunit MIP18	FAM96B
5.34673	2.82544	Q96T76-9;Q96T76;Q96T76-8;Q96T76-5;Q96T76-7	Q96T76-9;Q96T76;Q96T76-8;Q96T76-5	MMS19 nucleotide excision repair protein homolog	MMS19
7.64223	-4.37654	Q8N2K0-3;Q8N2K0;Q8N2K0-2	Q8N2K0-3;Q8N2K0;Q8N2K0-2	Monoacylglycerol lipase ABHD12	ABHD12
10.8788	1.09891	Q6UB35;Q6UB35-2	Q6UB35	Monofunctional C1-tetrahydrofolate synthase, mitochondrial	MTHFD1L
NaN	Upregulated	Q14149	Q14149	MORC family CW-type zinc finger protein 3	MORC3
NaN	Upregulated	Q13485	Q13485	Mothers against decapentaplegic homolog 4	SMAD4
NaN	Upregulated	O60942-2;O60942;O60942-3;O60942-4	O60942-2;O60942;O60942-3;O60942-4	mRNA-capping enzyme;Polynucleotide 5-triphosphatase;mRNA guanylyltransferase	RNGTT
4.24498	1.30307	Q9NPI6;Q9NPI6-2	Q9NPI6;Q9NPI6-2	mRNA-decapping enzyme 1A	DCP1A
NaN	Downregulated	Q9H3R2	Q9H3R2	Mucin-13	MUC13
7.29391	1.0861	P22234;P22234-2	P22234;P22234-2	Multifunctional protein ADE2;Phosphoribosylaminoimidazole-succinocarboxamide synthase;Phosphoribosylaminoimidazole carboxylase	PAICS
4.01044	1.02025	Q96EY5;Q96EY5-3;Q96EY5-2	Q96EY5;Q96EY5-3;Q96EY5-2	Multivesicular body subunit 12A	MVB12A
10.8233	1.66493	Q9NUJ1;Q9NUJ1-2;Q9NUJ1-3	Q9NUJ1;Q9NUJ1-2	Mycophenolic acid acyl-glucuronide esterase, mitochondrial	ABHD10
10.4265	2.14639	Q9NZM1-6;Q9NZM1;Q9NZM1-2;Q9NZM1-3;Q9NZM1-5;Q9NZM1-7;Q9NZM1-8;Q9NZM1-4;O75923-5;O75923-7;O75923-8;O75923-2;O75923-10;O75923-4;O75923-11;O75923;O75923-12;O75923-6;O75923-14;O75923-9;O75923-3;O75923-15;O75923-13	Q9NZM1-6;Q9NZM1;Q9NZM1-2;Q9NZM1-3;Q9NZM1-5	Myoferlin	MYOF
5.65136	3.1985	P35580;P35580-5;P35580-2;P35580-3;P35580-4	P35580;P35580-5;P35580-2;P35580-3;P35580-4	Myosin-10	MYH10
14.0376	-3.27509	Q7Z406-6;Q7Z406-2;Q7Z406;Q7Z406-4;Q7Z406-5	Q7Z406-6;Q7Z406-2;Q7Z406;Q7Z406-4;Q7Z406-5	Myosin-14	MYH14
NaN	Upregulated	O95248;O95248-5;O95248-4	O95248;O95248-5;O95248-4	Myotubularin-related protein 5	SBF1
8.87649	-3.75289	P20933	P20933	N(4)-(beta-N-acetylglucosaminyl)-L-asparaginase;Glycosylasparaginase alpha chain;Glycosylasparaginase beta chain	AGA
8.85189	-3.48527	O94760-2;O94760	O94760-2;O94760	N(G),N(G)-dimethylarginine dimethylaminohydrolase 1	DDAH1
7.32857	2.7304	Q86U44	Q86U44	N6-adenosine-methyltransferase 70 kDa subunit	METTL3
4.19318	-1.33848	Q01415-2;Q01415	Q01415-2;Q01415	N-acetylgalactosamine kinase	GALK2
6.96654	-1.60525	P34059	P34059	N-acetylgalactosamine-6-sulfatase	GALNS
6.76004	-3.53684	Q86SF2	Q86SF2	N-acetylgalactosaminyltransferase 7	GALNT7
NaN	Upregulated	O95671-3;O95671-2;O95671	O95671-3;O95671-2;O95671	N-acetylserotonin O-methyltransferase-like protein	ASMTL
NaN	Upregulated	Q9NX02-5;Q9NX02-2;Q9NX02;Q9NX02-4;Q9NX02-3;Q8WX94;Q8WX94-2;Q8WX94-3	Q9NX02-5;Q9NX02-2;Q9NX02;Q9NX02-4;Q9NX02-3	NACHT, LRR and PYD domains-containing protein 2	NLRP2
5.45519	-1.26371	Q8NFW8-2;Q8NFW8	Q8NFW8-2;Q8NFW8	N-acylneuraminate cytidylyltransferase	CMAS
5.18866	-1.27386	P15559;P15559-2;P15559-3	P15559;P15559-2;P15559-3	NAD(P)H dehydrogenase [quinone] 1	NQO1
6.0046	-2.16493	Q9UHQ9	Q9UHQ9	NADH-cytochrome b5 reductase 1	CYB5R1
1.891	1.01133	P41227;P41227-2	P41227;P41227-2	N-alpha-acetyltransferase 10	NAA10
5.70035	1.04319	Q9BXJ9;Q9BXJ9-4;Q6N069-5;Q6N069-4;Q6N069-3;Q6N069-2	Q9BXJ9	N-alpha-acetyltransferase 15, NatA auxiliary subunit	NAA15
7.3947	1.24442	Q14CX7;Q14CX7-2	Q14CX7;Q14CX7-2	N-alpha-acetyltransferase 25, NatB auxiliary subunit	NAA25
5.52407	1.28096	Q9GZZ1;Q9GZZ1-2	Q9GZZ1	N-alpha-acetyltransferase 50	NAA50
3.18408	1.05317	Q13765;E9PAV3-2;E9PAV3;Q9BZK3	Q13765;E9PAV3-2;E9PAV3	Nascent polypeptide-associated complex subunit alpha;Nascent polypeptide-associated complex subunit alpha, muscle-specific form	NACA
3.78605	1.25319	Q13564-2;Q13564;Q13564-4;Q13564-3	Q13564-2;Q13564;Q13564-4;Q13564-3	NEDD8-activating enzyme E1 regulatory subunit	NAE1
2.18624	-1.01515	Q6ZNJ1-2;Q6ZNJ1-3;Q6ZNJ1	Q6ZNJ1-2;Q6ZNJ1-3;Q6ZNJ1	Neurobeachin-like protein 2	NBEAL2
NaN	Downregulated	P21359-2;P21359-6;P21359;P21359-4;P21359-3;P21359-5	P21359-2;P21359-6;P21359;P21359-4	Neurofibromin;Neurofibromin truncated	NF1
2.03338	-1.2062	Q8NEJ9-2;Q8NEJ9	Q8NEJ9-2;Q8NEJ9	Neuroguidin	NGDN
8.67567	1.14408	Q8IY17-5;Q8IY17-2;Q8IY17-3;Q8IY17	Q8IY17-5;Q8IY17-2;Q8IY17-3;Q8IY17	Neuropathy target esterase	PNPLA6
6.13329	1.30177	P30989	P30989	Neurotensin receptor type 1	NTSR1
7.6432	-1.67389	Q15758;Q15758-3;Q15758-2	Q15758;Q15758-3;Q15758-2	Neutral amino acid transporter B(0)	SLC1A5
4.51744	-1.06042	Q92542-2;Q92542	Q92542-2;Q92542	Nicastrin	NCSTN
2.81832	-1.31234	Q6KC79;Q6KC79-2;Q6KC79-3	Q6KC79;Q6KC79-2	Nipped-B-like protein	NIPBL
2.27314	-2.4003	P22307;P22307-8;P22307-4;P22307-7;P22307-6;P22307-2;P22307-3	P22307;P22307-8;P22307-4;P22307-7	Non-specific lipid-transfer protein	SCP2
4.33216	1.46673	Q9BV86;Q9BV86-2	Q9BV86;Q9BV86-2	N-terminal Xaa-Pro-Lys N-methyltransferase 1;N-terminal Xaa-Pro-Lys N-methyltransferase 1, N-terminally processed	NTMT1
4.37368	1.52396	P23497-7;P23497-6;P23497-5;P23497-2;P23497-3;P23497;P23497-4;Q9H930-1;Q9H930-2;Q9H930;Q9H930-3	P23497-7;P23497-6;P23497-5;P23497-2;P23497-3;P23497;P23497-4	Nuclear autoantigen Sp-100	SP100
4.97666	1.44889	P19838-2;P19838;P19838-3	P19838-2;P19838;P19838-3	Nuclear factor NF-kappa-B p105 subunit;Nuclear factor NF-kappa-B p50 subunit	NFKB1
11.3467	-1.34503	Q14980;Q14980-2;Q14980-4;Q14980-3;Q14980-5	Q14980;Q14980-2;Q14980-4;Q14980-3	Nuclear mitotic apparatus protein 1	NUMA1
6.15892	-1.10847	P35658-2;P35658-4;P35658;P35658-3;P35658-5	P35658-2;P35658-4;P35658;P35658-3;P35658-5	Nuclear pore complex protein Nup214	NUP214
4.04121	1.10124	Q8TAT6;Q8TAT6-2	Q8TAT6;Q8TAT6-2	Nuclear protein localization protein 4 homolog	NPLOC4
3.56049	1.07078	P61970	P61970	Nuclear transport factor 2	NUTF2
5.38383	-1.04175	O15381-5;O15381;O15381-3;O15381-2;O15381-4	O15381-5;O15381;O15381-3;O15381-2;O15381-4	Nuclear valosin-containing protein-like	NVL
3.69009	-1.07119	P80303-2;P80303	P80303-2;P80303	Nucleobindin-2;Nesfatin-1	NUCB2
7.65845	1.15254	Q8WTT2	Q8WTT2	Nucleolar complex protein 3 homolog	NOC3L
NaN	Downregulated	Q96MY1;O94818-4;Q96MY1-2;O94818-2;O94818-3;O94818	Q96MY1	Nucleolar protein 4-like	NOL4L
4.14407	1.02998	O75607	O75607	Nucleoplasmin-3	NPM3
5.62751	1.30677	P22392-2;P22392;O60361	P22392-2;P22392	Nucleoside diphosphate kinase B	NME2
7.90437	1.16054	Q96RS6;Q96RS6-2;Q96RS6-3	Q96RS6;Q96RS6-2;Q96RS6-3	NudC domain-containing protein 1	NUDCD1
5.67364	2.18219	Q8WVJ2	Q8WVJ2	NudC domain-containing protein 2	NUDCD2
2.98794	1.38269	Q8IVD9	Q8IVD9	NudC domain-containing protein 3	NUDCD3
10.3283	1.90096	P36551;P36551-2	P36551	Oxygen-dependent coproporphyrinogen-III oxidase, mitochondrial	CPOX
4.05571	1.21133	Q15645	Q15645	Pachytene checkpoint protein 2 homolog	TRIP13
5.00831	-2.02268	P50897;P50897-2	P50897	Palmitoyl-protein thioesterase 1	PPT1
4.7037	-1.17675	Q8IUH4;Q8IUH4-2;Q8IUH4-3	Q8IUH4;Q8IUH4-2;Q8IUH4-3	Palmitoyltransferase ZDHHC13	ZDHHC13
4.28449	2.58132	Q9NVE7	Q9NVE7	Pantothenate kinase 4	PANK4
4.56655	1.78208	P49023-2;P49023;P49023-3;P49023-4	P49023-2;P49023;P49023-3;P49023-4	Paxillin	PXN
3.94688	1.74417	O75475;O75475-3;O75475-2	O75475;O75475-3;O75475-2	PC4 and SFRS1-interacting protein	PSIP1
NaN	Upregulated	Q96JY6-5;Q96JY6;Q96JY6-3;Q96JY6-4;Q96JY6-2	Q96JY6-5;Q96JY6;Q96JY6-3;Q96JY6-4	PDZ and LIM domain protein 2	PDLIM2
7.48908	-1.00055	Q8NEN9	Q8NEN9	PDZ domain-containing protein 8	PDZD8
4.25194	-1.17723	O75127	O75127	Pentatricopeptide repeat-containing protein 1, mitochondrial	PTCD1
5.09652	-1.66479	P23284	P23284	Peptidyl-prolyl cis-trans isomerase B	PPIB
4.41332	4.16081	Q08752	Q08752	Peptidyl-prolyl cis-trans isomerase D	PPID
7.35258	-1.19155	Q96AY3;Q96AY3-2	Q96AY3	Peptidyl-prolyl cis-trans isomerase FKBP10	FKBP10
9.77896	1.29862	Q00688	Q00688	Peptidyl-prolyl cis-trans isomerase FKBP3	FKBP3
8.37068	1.15416	Q02790	Q02790	Peptidyl-prolyl cis-trans isomerase FKBP4;Peptidyl-prolyl cis-trans isomerase FKBP4, N-terminally processed	FKBP4
7.46732	2.31932	Q13451;Q13451-2	Q13451	Peptidyl-prolyl cis-trans isomerase FKBP5;Peptidyl-prolyl cis-trans isomerase FKBP5, N-terminally processed	FKBP5
4.60986	-1.7433	O95302;O95302-3;O95302-2	O95302;O95302-3	Peptidyl-prolyl cis-trans isomerase FKBP9	FKBP9
4.06009	1.61209	Q13526	Q13526	Peptidyl-prolyl cis-trans isomerase NIMA-interacting 1	PIN1
12.0594	2.9335	O60664-4;O60664-3;O60664;O60664-2	O60664-4;O60664-3;O60664	Perilipin-3	PLIN3
9.42601	-1.08635	O60437	O60437	Periplakin	PPL
3.26946	1.00657	Q06830	Q06830	Peroxiredoxin-1	PRDX1
7.61876	1.438	P30041	P30041	Peroxiredoxin-6	PRDX6
4.20299	-2.08479	O15254;O15254-2	O15254;O15254-2	Peroxisomal acyl-coenzyme A oxidase 3	ACOX3
8.06545	-1.08633	P51659;P51659-3;P51659-2	P51659;P51659-3;P51659-2	Peroxisomal multifunctional enzyme type 2;(3R)-hydroxyacyl-CoA dehydrogenase;Enoyl-CoA hydratase 2	HSD17B4
1.65278	-1.16637	Q92576-2;Q92576	Q92576-2;Q92576	PHD finger protein 3	PHF3
3.87312	1.51809	Q96BW9-2;Q96BW9-3;Q96BW9	Q96BW9-2;Q96BW9-3;Q96BW9	Phosphatidate cytidylyltransferase, mitochondrial	TAMM41
5.44764	2.35544	P48739;P48739-2;P48739-3	P48739;P48739-2;P48739-3	Phosphatidylinositol transfer protein beta isoform	PITPNB
7.46581	-1.19248	Q13492-2;Q13492-5;Q13492;Q13492-4;Q13492-3;O60641-3;O60641-4;O60641	Q13492-2;Q13492-5;Q13492;Q13492-4;Q13492-3	Phosphatidylinositol-binding clathrin assembly protein	PICALM
5.59904	1.74602	O95394;O95394-3;O95394-4	O95394;O95394-3;O95394-4	Phosphoacetylglucosamine mutase	PGM3
12.5205	-2.02483	Q16822;Q16822-3;Q16822-2	Q16822;Q16822-3;Q16822-2	Phosphoenolpyruvate carboxykinase [GTP], mitochondrial	PCK2
2.03283	1.27831	P36871;P36871-2;P36871-3	P36871;P36871-2;P36871-3	Phosphoglucomutase-1	PGM1
8.56821	1.24504	P18669;Q8N0Y7;P15259	P18669	Phosphoglycerate mutase 1	PGAM1
3.38772	1.72474	Q9H008;Q9H008-2	Q9H008;Q9H008-2	Phospholysine phosphohistidine inorganic pyrophosphate phosphatase	LHPP
NaN	Upregulated	Q9HAB8;Q9HAB8-2	Q9HAB8;Q9HAB8-2	Phosphopantothenate--cysteine ligase	PPCS
7.0637	1.25879	Q14558;Q14558-2	Q14558;Q14558-2	Phosphoribosyl pyrophosphate synthase-associated protein 1	PRPSAP1
5.6838	2.63296	O60256-2;O60256;O60256-4;O60256-3	O60256-2;O60256;O60256-4;O60256-3	Phosphoribosyl pyrophosphate synthase-associated protein 2	PRPSAP2
3.63056	1.99204	O15067	O15067	Phosphoribosylformylglycinamidine synthase	PFAS
NaN	Downregulated	Q92508	Q92508	Piezo-type mechanosensitive ion channel component 1	PIEZO1
1.96847	1.0483	Q9BTY2;Q9BTY2-2	Q9BTY2;Q9BTY2-2	Plasma alpha-L-fucosidase	FUCA2
7.00312	-1.71778	Q9HAU0-4;Q9HAU0-6;Q9HAU0-5;Q9HAU0-8;Q9HAU0;Q9HAU0-2;Q9HAU0-3;Q9HAU0-7	Q9HAU0-4;Q9HAU0-6;Q9HAU0-5;Q9HAU0-8;Q9HAU0;Q9HAU0-2;Q9HAU0-3	Pleckstrin homology domain-containing family A member 5	PLEKHA5
NaN	Downregulated	Q6IQ23-2;Q6IQ23;Q6IQ23-3	Q6IQ23-2;Q6IQ23;Q6IQ23-3	Pleckstrin homology domain-containing family A member 7	PLEKHA7
NaN	Upregulated	Q9H8W4	Q9H8W4	Pleckstrin homology domain-containing family F member 2	PLEKHF2
NaN	Downregulated	O75051	O75051	Plexin-A2	PLXNA2
5.39268	2.10106	P51003;P51003-2;Q9NRJ5	P51003	Poly(A) polymerase alpha	PAPOLA
9.80911	2.8143	Q6NZI2;Q6NZI2-2	Q6NZI2;Q6NZI2-2	Polymerase I and transcript release factor	PTRF
7.65922	-1.59397	Q10471;Q10471-2	Q10471	Polypeptide N-acetylgalactosaminyltransferase 2;Polypeptide N-acetylgalactosaminyltransferase 2 soluble form	GALNT2
8.78497	-6.22438	Q14435;Q14435-2	Q14435	Polypeptide N-acetylgalactosaminyltransferase 3	GALNT3
NaN	Downregulated	Q8NCL4	Q8NCL4	Polypeptide N-acetylgalactosaminyltransferase 6	GALNT6
7.29744	-1.27066	Q8TCS8	Q8TCS8	Polyribonucleotide nucleotidyltransferase 1, mitochondrial	PNPT1
2.43604	-1.24546	O94913	O94913	Pre-mRNA cleavage complex 2 protein Pcf11	PCF11
9.41025	-1.41517	Q9UHG3	Q9UHG3	Prenylcysteine oxidase 1	PCYOX1
5.7799	3.56085	Q2NL82	Q2NL82	Pre-rRNA-processing protein TSR1 homolog	TSR1
3.41197	-1.20834	P49768-7;P49768-2;P49768;P49768-4;P49768-3;P49768-5;P49768-6	P49768-7;P49768-2;P49768;P49768-4;P49768-3;P49768-5;P49768-6	Presenilin-1;Presenilin-1 NTF subunit;Presenilin-1 CTF subunit;Presenilin-1 CTF12	PSEN1
7.64269	-1.13158	Q5JRX3;Q5JRX3-2;Q5JRX3-3	Q5JRX3;Q5JRX3-2;Q5JRX3-3	Presequence protease, mitochondrial	PITRM1
7.69896	2.18059	Q96P11;Q96P11-2;Q96P11-4;Q96P11-5;Q96P11-3	Q96P11;Q96P11-2;Q96P11-4;Q96P11-5	Probable 28S rRNA (cytosine-C(5))-methyltransferase	NSUN5
4.84285	-2.00351	Q5T160	Q5T160	Probable arginine--tRNA ligase, mitochondrial	RARS2
4.72683	-1.39049	Q96I59	Q96I59	Probable asparagine--tRNA ligase, mitochondrial	NARS2
4.85079	-1.11828	Q13206	Q13206	Probable ATP-dependent RNA helicase DDX10	DDX10
2.7982	1.02063	Q9UHI6;Q9UHI6-2	Q9UHI6	Probable ATP-dependent RNA helicase DDX20	DDX20
2.31504	1.18187	Q2PZI1;Q2PZI1-2;Q6NUT2	Q2PZI1	Probable C-mannosyltransferase DPY19L1	DPY19L1
2.64676	1.35971	O76071	O76071	Probable cytosolic iron-sulfur protein assembly protein CIAO1	CIAO1
3.07033	1.9217	Q9UNQ2	Q9UNQ2	Probable dimethyladenosine transferase	DIMT1
2.0705	1.50357	P42694;P42694-2	P42694;P42694-2	Probable helicase with zinc finger domain	HELZ
6.27296	-1.26956	Q8N490;Q8N490-4;Q8N490-3;Q8N490-2	Q8N490;Q8N490-4;Q8N490-3	Probable hydrolase PNKD	PNKD
NaN	Downregulated	Q2M2H8;Q2M2H8-3;O43451	Q2M2H8	Probable maltase-glucoamylase-like protein LOC93432;Glucoamylase
NaN	Downregulated	Q13395	Q13395	Probable methyltransferase TARBP1	TARBP1
3.01881	1.07512	A6NJ78;A6NJ78-2;P0C7V9;A6NJ78-4;A6NJ78-3	A6NJ78;A6NJ78-2	Probable methyltransferase-like protein 15	METTL15
2.62804	1.09707	Q9NQH7-2;Q9NQH7-4;Q9NQH7	Q9NQH7-2;Q9NQH7-4;Q9NQH7	Probable Xaa-Pro aminopeptidase 3	XPNPEP3
10.4052	-2.44116	O00469-2;O00469;O00469-3	O00469-2;O00469;O00469-3	Procollagen-lysine,2-oxoglutarate 5-dioxygenase 2	PLOD2
10.369	-1.93352	O60568	O60568	Procollagen-lysine,2-oxoglutarate 5-dioxygenase 3	PLOD3
7.66092	1.72594	P07737	P07737	Profilin-1	PFN1
8.96857	1.44247	Q8WUM4-2;Q8WUM4;Q8WUM4-3	Q8WUM4-2;Q8WUM4	Programmed cell death 6-interacting protein	PDCD6IP
3.83731	-1.47314	Q9HCU5	Q9HCU5	Prolactin regulatory element-binding protein	PREB
4.82367	1.05544	P12004	P12004	Proliferating cell nuclear antigen	PCNA
4.76601	1.86378	Q8IVL6-2;Q8IVL6	Q8IVL6-2;Q8IVL6	Prolyl 3-hydroxylase 3	LEPREL2
3.69495	-2.41791	O15460;O15460-2	O15460;O15460-2	Prolyl 4-hydroxylase subunit alpha-2	P4HA2
9.08735	2.19373	P48147	P48147	Prolyl endopeptidase	PREP
5.54961	-2.03343	O43490-4;O43490-7;O43490-2;O43490;O43490-5;O43490-3;O43490-6	O43490-4;O43490-7;O43490-2;O43490;O43490-5;O43490-3;O43490-6	Prominin-1	PROM1
NaN	Downregulated	Q8N271;Q8N271-2;Q8N271-3	Q8N271;Q8N271-2	Prominin-2	PROM2
6.21742	-1.55863	P05165;P05165-2;P05165-3	P05165;P05165-2;P05165-3	Propionyl-CoA carboxylase alpha chain, mitochondrial	PCCA
6.2266	-1.36922	P05166;P05166-2	P05166;P05166-2	Propionyl-CoA carboxylase beta chain, mitochondrial	PCCB
6.70437	-1.37967	P07602;P07602-2;P07602-3	P07602;P07602-2;P07602-3	Prosaposin;Saposin-A;Saposin-B-Val;Saposin-B;Saposin-C;Saposin-D	PSAP
5.06139	2.01507	P28074;P28074-3;P28074-2	P28074;P28074-3;P28074-2	Proteasome subunit beta type-5	PSMB5
NaN	Downregulated	P28062-2;P28062	P28062-2;P28062	Proteasome subunit beta type-8	PSMB8
5.15573	1.07221	Q5VYK3	Q5VYK3	Proteasome-associated protein ECM29 homolog	ECM29
4.72978	-1.38563	P11171-3;P11171-2;P11171;P11171-6;P11171-4;P11171-5;P11171-7	P11171-3;P11171-2;P11171;P11171-6;P11171-4;P11171-5;P11171-7	Protein 4.1	EPB41
10.3595	1.63529	Q99873-3;Q99873-2;Q99873;Q99873-5	Q99873-3;Q99873-2;Q99873;Q99873-5	Protein arginine N-methyltransferase 1	PRMT1
6.29733	2.16687	O14744-5;O14744;O14744-3;O14744-2;O14744-4	O14744-5;O14744;O14744-3;O14744-2;O14744-4	Protein arginine N-methyltransferase 5;Protein arginine N-methyltransferase 5, N-terminally processed	PRMT5
4.33066	-1.95391	Q9Y2B0;Q9Y2B0-2	Q9Y2B0;Q9Y2B0-2	Protein canopy homolog 2	CNPY2
9.8753	-1.7101	P30101	P30101	Protein disulfide-isomerase A3	PDIA3
10.0504	-1.11747	P13667	P13667	Protein disulfide-isomerase A4	PDIA4
12.8367	-2.14722	Q15084-3;Q15084;Q15084-4;Q15084-5;Q15084-2	Q15084-3;Q15084;Q15084-4;Q15084-5;Q15084-2	Protein disulfide-isomerase A6	PDIA6
7.95351	-2.881	Q96JJ7-2;Q96JJ7	Q96JJ7-2;Q96JJ7	Protein disulfide-isomerase TMX3	TMX3
3.07569	-1.18122	Q86VR2	Q86VR2	Protein FAM134C	FAM134C
6.30317	1.04561	Q92520	Q92520	Protein FAM3C	FAM3C
7.10117	-1.08322	Q6ZRV2	Q6ZRV2	Protein FAM83H	FAM83H
7.84354	-2.50997	Q96KN1	Q96KN1	Protein FAM84B	FAM84B
NaN	Upregulated	P49354;P49354-2	P49354;P49354-2	Protein farnesyltransferase/geranylgeranyltransferase type-1 subunit alpha	FNTA
6.45405	2.24184	O94915;O94915-2	O94915	Protein furry homolog-like	FRYL
4.72861	2.63082	O94992	O94992	Protein HEXIM1	HEXIM1
2.60427	-1.02204	Q9UNF0-2;Q9UNF0	Q9UNF0-2;Q9UNF0	Protein kinase C and casein kinase substrate in neurons protein 2	PACSIN2
2.74733	1.5588	Q9UKS6	Q9UKS6	Protein kinase C and casein kinase substrate in neurons protein 3	PACSIN3
4.5962	-1.69476	P41743	P41743	Protein kinase C iota type	PRKCI
5.04096	-1.25555	Q9ULU4-12;Q9ULU4-7;Q9ULU4-17;Q9ULU4-10;Q9ULU4-13;Q9ULU4-8;Q9ULU4-14;Q9ULU4-5;Q9ULU4-22;Q9ULU4-16;Q9ULU4-9;Q9ULU4-11;Q9ULU4-20;Q9ULU4;Q9ULU4-19;Q9ULU4-18;Q9ULU4-21;Q9ULU4-15;Q9ULU4-23;Q9ULU4-6;Q9ULU4-3;Q9ULU4-4;Q9ULU4-2	Q9ULU4-12;Q9ULU4-7;Q9ULU4-17;Q9ULU4-10;Q9ULU4-13;Q9ULU4-8;Q9ULU4-14;Q9ULU4-5;Q9ULU4-22;Q9ULU4-16;Q9ULU4-9;Q9ULU4-11;Q9ULU4-20;Q9ULU4;Q9ULU4-19;Q9ULU4-18;Q9ULU4-21;Q9ULU4-15;Q9ULU4-23;Q9ULU4-6;Q9ULU4-3	Protein kinase C-binding protein 1	ZMYND8
10.0639	-1.30591	Q9BPW8	Q9BPW8	Protein NipSnap homolog 1	NIPSNAP1
3.87944	-1.53325	P49757-3;P49757;P49757-4;P49757-2;P49757-9;P49757-8;P49757-7;P49757-6;P49757-5	P49757-3;P49757;P49757-4;P49757-2	Protein numb homolog	NUMB
6.46055	2.82269	O60502;O60502-2;O60502-4;O60502-3	O60502;O60502-2;O60502-4;O60502-3	Protein O-GlcNAcase	MGEA5
3.78869	1.19687	O14974-4;O14974-2;O14974;O14974-3;O14974-5	O14974-4;O14974-2;O14974;O14974-3;O14974-5	Protein phosphatase 1 regulatory subunit 12A	PPP1R12A
2.39268	1.09322	Q6ZMI0;Q6ZMI0-5;Q6ZMI0-2;Q6ZMI0-3;Q6ZMI0-4	Q6ZMI0;Q6ZMI0-5;Q6ZMI0-2;Q6ZMI0-3	Protein phosphatase 1 regulatory subunit 21	PPP1R21
6.04025	-1.09702	Q14160-3;Q14160;Q14160-2	Q14160-3;Q14160;Q14160-2	Protein scribble homolog	SCRIB
3.85174	1.36194	Q15436;Q15436-2	Q15436	Protein transport protein Sec23A	SEC23A
4.96835	1.02016	O95487-2;O95487;O95487-3	O95487-2;O95487;O95487-3	Protein transport protein Sec24B	SEC24B
3.4905	-2.17793	O75695	O75695	Protein XRP2	RP2
3.35382	-1.54114	Q9GZM5	Q9GZM5	Protein YIPF3;Protein YIPF3, 36 kDa form III	YIPF3
NaN	Downregulated	O94851-6;O94851-4;O94851-2;O94851-5;O94851-3;O94851	O94851-6;O94851-4;O94851-2;O94851-5;O94851-3;O94851	Protein-methionine sulfoxide oxidase MICAL2	MICAL2
8.31748	2.17841	Q14517	Q14517	Protocadherin Fat 1;Protocadherin Fat 1, nuclear form	FAT1
11.2707	2.08011	P55786;P55786-2;A6NEC2;A6NEC2-2;A6NEC2-3	P55786;P55786-2	Puromycin-sensitive aminopeptidase	NPEPPS
8.65723	1.00641	Q7L2E3-3;Q7L2E3;Q7L2E3-2	Q7L2E3-3;Q7L2E3;Q7L2E3-2	Putative ATP-dependent RNA helicase DHX30	DHX30
3.77435	-1.3786	O43824	O43824	Putative GTP-binding protein 6	GTPBP6
7.19244	2.19372	Q9HCE1;Q9HCE1-2;Q9HCE1-3	Q9HCE1;Q9HCE1-2	Putative helicase MOV-10	MOV10
8.49706	-1.61738	Q49A26-5;Q49A26-4;Q49A26-2;Q49A26-3;Q49A26	Q49A26-5;Q49A26-4;Q49A26-2;Q49A26-3;Q49A26	Putative oxidoreductase GLYR1	GLYR1
8.08261	-2.26427	Q5T440	Q5T440	Putative transferase CAF17, mitochondrial	IBA57
2.443	-1.50378	C4AMC7;Q6VEQ5;Q9NQA3;A8K0Z3;A8MWX3	C4AMC7;Q6VEQ5;Q9NQA3;A8K0Z3	Putative WAS protein family homolog 3;WAS protein family homolog 2;WAS protein family homolog 6;WAS protein family homolog 1	WASH3P;WASH2P;WASH6P;WASH1
7.59838	-2.89282	P11498;P11498-2	P11498	Pyruvate carboxylase, mitochondrial	PC
6.9657	-1.2629	Q08257;Q08257-3;Q08257-2	Q08257;Q08257-3	Quinone oxidoreductase	CRYZ
7.19607	1.65502	P60028;P31150	P60028;P31150	Rab GDP dissociation inhibitor alpha	GDI1
6.353	1.55116	Q6WKZ4;Q6WKZ4-3;Q6WKZ4-2;Q6WKZ4-1	Q6WKZ4;Q6WKZ4-3;Q6WKZ4-2	Rab11 family-interacting protein 1	RAB11FIP1
8.10837	-1.41741	Q6IAA8	Q6IAA8	Ragulator complex protein LAMTOR1	LAMTOR1
5.70191	-1.7677	Q9Y2Q5;Q9Y2Q5-2;Q9Y2Q5-3	Q9Y2Q5;Q9Y2Q5-2	Ragulator complex protein LAMTOR2	LAMTOR2
6.14597	-1.54705	Q9UHA4;Q9UHA4-2	Q9UHA4;Q9UHA4-2	Ragulator complex protein LAMTOR3	LAMTOR3
4.77217	-1.07625	O43504	O43504	Ragulator complex protein LAMTOR5	LAMTOR5
7.47621	1.04574	Q13283;Q13283-2	Q13283	Ras GTPase-activating protein-binding protein 1	G3BP1
1.33417	-1.03544	P61026	P61026	Ras-related protein Rab-10	RAB10
9.01058	-1.09498	Q9H0U4;Q92928	Q9H0U4;Q92928	Ras-related protein Rab-1B;Putative Ras-related protein Rab-1C	RAB1B;RAB1C
4.60206	-2.4922	O95716	O95716	Ras-related protein Rab-3D	RAB3D
3.34243	-1.32115	P04626-5;P04626-4;P04626;P04626-3;P04626-2	P04626-5;P04626-4;P04626;P04626-3;P04626-2	Receptor tyrosine-protein kinase erbB-2	ERBB2
NaN	Upregulated	P23470-2;P23470	P23470-2;P23470	Receptor-type tyrosine-protein phosphatase gamma	PTPRG
NaN	Downregulated	Q9HD43-3;Q9HD43-2;Q9HD43	Q9HD43-3;Q9HD43-2;Q9HD43	Receptor-type tyrosine-protein phosphatase H	PTPRH
6.62751	1.19708	Q96DB5;Q96DB5-3;Q96DB5-2	Q96DB5;Q96DB5-3;Q96DB5-2	Regulator of microtubule dynamics protein 1	RMDN1
6.68613	-1.09574	Q96TC7;Q96TC7-2	Q96TC7;Q96TC7-2	Regulator of microtubule dynamics protein 3	RMDN3
2.42056	1.29501	P40938;P40938-2	P40938;P40938-2	Replication factor C subunit 3	RFC3
5.81628	2.13101	P35244	P35244	Replication protein A 14 kDa subunit	RPA3
3.25619	1.66272	P15927;P15927-2;P15927-3	P15927;P15927-2;P15927-3	Replication protein A 32 kDa subunit	RPA2
7.99578	1.18835	P27694	P27694	Replication protein A 70 kDa DNA-binding subunit;Replication protein A 70 kDa DNA-binding subunit, N-terminally processed	RPA1
1.44831	-1.02011	Q8WWV3;Q8WWV3-2;Q8WWV3-3	Q8WWV3;Q8WWV3-2;Q8WWV3-3	Reticulon-4-interacting protein 1, mitochondrial	RTN4IP1
4.31401	-2.28287	Q8IZV5	Q8IZV5	Retinol dehydrogenase 10	RDH10
NaN	Upregulated	P09455;P09455-2;P09455-3	P09455;P09455-2;P09455-3	Retinol-binding protein 1	RBP1
8.7737	1.33902	P52565;P52565-2	P52565;P52565-2	Rho GDP-dissociation inhibitor 1	ARHGDIA
NaN	Downregulated	Q9P227-2;Q9P227	Q9P227-2;Q9P227	Rho GTPase-activating protein 23	ARHGAP23
NaN	Upregulated	O15013-7;O15013-4;O15013-5;O15013-6;O15013	O15013-7;O15013-4;O15013-5;O15013-6;O15013	Rho guanine nucleotide exchange factor 10	ARHGEF10
4.34014	1.75911	Q14155-1;Q14155-5;Q14155-6;Q14155-2;Q14155-3;Q14155	Q14155-1;Q14155-5;Q14155-6;Q14155-2;Q14155-3;Q14155	Rho guanine nucleotide exchange factor 7	ARHGEF7
4.79233	2.29212	Q9HBH0;Q9HBH0-2	Q9HBH0;Q9HBH0-2	Rho-related GTP-binding protein RhoF	RHOF
4.93757	1.02419	Q9BST9;Q9BST9-3;Q9BST9-2	Q9BST9;Q9BST9-3;Q9BST9-2	Rhotekin	RTKN
NaN	Downregulated	Q9BUL9	Q9BUL9	Ribonuclease P protein subunit p25	RPP25
3.73852	1.2046	P78346;P78346-2	P78346;P78346-2	Ribonuclease P protein subunit p30	RPP30
10.6179	-3.91706	O00584;O00584-2	O00584	Ribonuclease T2	RNASET2
7.0345	1.72179	P23921;Q76RD8;P20503;P0DSV2;P0DSV1	P23921	Ribonucleoside-diphosphate reductase large subunit	RRM1
3.08843	1.77664	P49247	P49247	Ribose-5-phosphate isomerase	RPIA
2.64566	-1.51588	O43159	O43159	Ribosomal RNA-processing protein 8	RRP8
4.16043	1.00836	Q9H6T3-3;Q9H6T3-2;Q9H6T3	Q9H6T3-3;Q9H6T3-2;Q9H6T3	RNA polymerase II-associated protein 3	RPAP3
1.6347	-1.01066	Q9P2N5	Q9P2N5	RNA-binding protein 27	RBM27
3.88323	1.37634	P35637-2;P35637	P35637-2;P35637	RNA-binding protein FUS	FUS
NaN	Upregulated	O43347	O43347	RNA-binding protein Musashi homolog 1	MSI1
8.41988	-2.30041	Q9UKM9;Q9UKM9-2	Q9UKM9;Q9UKM9-2	RNA-binding protein Raly	RALY
3.02725	-1.68111	Q96GQ5;Q96GQ5-2	Q96GQ5	RUS1 family protein C16orf58	C16orf58
4.45286	1.36471	P31153;P31153-2;Q00266	P31153;P31153-2	S-adenosylmethionine synthase isoform type-2	MAT2A
1.88818	1.07132	Q6P3W7	Q6P3W7	SCY1-like protein 2	SCYL2
2.09629	1.58201	Q9Y6Y8-2;Q9Y6Y8	Q9Y6Y8-2;Q9Y6Y8	SEC23-interacting protein	SEC23IP
NaN	Upregulated	Q96FV2-2;Q96FV2	Q96FV2-2;Q96FV2	Secernin-2	SCRN2
4.21765	2.91569	Q9UHJ6	Q9UHJ6	Sedoheptulokinase	SHPK
8.60065	-1.13988	Q13501;Q13501-2	Q13501;Q13501-2	Sequestosome-1	SQSTM1
5.14715	3.59541	Q96GA7	Q96GA7	Serine dehydratase-like	SDSL
7.50449	-1.25105	P34897-3;P34897;P34897-2	P34897-3;P34897;P34897-2	Serine hydroxymethyltransferase, mitochondrial	SHMT2
5.79259	1.09816	Q9UQ35;Q9UQ35-2;Q9UQ35-3	Q9UQ35;Q9UQ35-2	Serine/arginine repetitive matrix protein 2	SRRM2
5.05088	1.48535	Q05519-2;Q05519	Q05519-2;Q05519	Serine/arginine-rich splicing factor 11	SRSF11
NaN	Downregulated	Q8IWU2	Q8IWU2	Serine/threonine-protein kinase LMTK2	LMTK2
3.40857	1.38531	O95747	O95747	Serine/threonine-protein kinase OSR1	OXSR1
6.65311	1.13221	Q99986	Q99986	Serine/threonine-protein kinase VRK1	VRK1
NaN	Downregulated	O75460	O75460	Serine/threonine-protein kinase/endoribonuclease IRE1;Serine/threonine-protein kinase;Endoribonuclease	ERN1
5.19293	1.83901	P63151;P63151-2;Q66LE6;Q00005-6;Q00005;Q00005-2;Q00005-3;Q00005-4;Q00005-5;Q00005-7	P63151;P63151-2;Q66LE6	Serine/threonine-protein phosphatase 2A 55 kDa regulatory subunit B alpha isoform;Serine/threonine-protein phosphatase 2A 55 kDa regulatory subunit B delta isoform	PPP2R2A;PPP2R2D
2.23756	1.60692	P60510	P60510	Serine/threonine-protein phosphatase 4 catalytic subunit	PPP4C
6.27744	1.41098	P53041	P53041	Serine/threonine-protein phosphatase 5	PPP5C
7.21256	-1.71988	P02787	P02787	Serotransferrin	TF
5.37469	1.94336	P35237	P35237	Serpin B6	SERPINB6
5.7401	4.60129	P50453	P50453	Serpin B9	SERPINB9
7.53198	-1.54723	Q15165-3;Q15165-1;Q15165	Q15165-3;Q15165-1;Q15165	Serum paraoxonase/arylesterase 2	PON2
3.08323	1.49724	Q9UBL3;Q9UBL3-3;Q9UBL3-2	Q9UBL3;Q9UBL3-3;Q9UBL3-2	Set1/Ash2 histone methyltransferase complex subunit ASH2	ASH2L
5.65599	1.97615	P10768	P10768	S-formylglutathione hydrolase	ESD
5.80527	2.03238	O75368	O75368	SH3 domain-binding glutamic acid-rich-like protein	SH3BGRL
6.74666	1.22049	A0MZ66-5;A0MZ66-6;A0MZ66;A0MZ66-3;A0MZ66-8;A0MZ66-4;A0MZ66-2;A0MZ66-7	A0MZ66-5;A0MZ66-6;A0MZ66;A0MZ66-3;A0MZ66-8;A0MZ66-4;A0MZ66-2	Shootin-1	KIAA1598
8.1427	-1.29985	O75911;O75911-2	O75911	Short-chain dehydrogenase/reductase 3	DHRS3
NaN	Downregulated	Q5T5P2-3;Q5T5P2;Q5T5P2-4;Q5T5P2-8;Q5T5P2-6;Q5T5P2-9;Q5T5P2-2;Q5T5P2-7;Q5T5P2-10	Q5T5P2-3;Q5T5P2;Q5T5P2-4;Q5T5P2-8;Q5T5P2-6;Q5T5P2-9;Q5T5P2-2;Q5T5P2-7;Q5T5P2-10	Sickle tail protein homolog	KIAA1217
4.5684	-1.62551	Q9BWM7	Q9BWM7	Sideroflexin-3	SFXN3
2.6746	1.26293	P09132;P09132-2	P09132;P09132-2	Signal recognition particle 19 kDa protein	SRP19
6.86383	-1.52395	P08240-2;P08240	P08240-2;P08240	Signal recognition particle receptor subunit alpha	SRPR
7.90892	1.00785	O76094;O76094-2	O76094;O76094-2	Signal recognition particle subunit SRP72	SRP72
6.95313	-2.15688	Q9NTI5-2;Q9NTI5;Q9NTI5-3;Q9NTI5-4	Q9NTI5-2;Q9NTI5	Sister chromatid cohesion protein PDS5 homolog B	PDS5B
5.79372	-2.52209	P05026-2;P05026	P05026-2;P05026	Sodium/potassium-transporting ATPase subunit beta-1	ATP1B1
7.16744	1.39134	Q96QD8;Q96QD8-2	Q96QD8	Sodium-coupled neutral amino acid transporter 2	SLC38A2
4.1295	-1.99335	Q8WVQ1;Q8WVQ1-3;Q8WVQ1-2	Q8WVQ1;Q8WVQ1-3	Soluble calcium-activated nucleotidase 1	CANT1
NaN	Upregulated	Q9Y6X4	Q9Y6X4	Soluble lamin-associated protein of 75 kDa	FAM169A
10.7943	-3.43616	P55011-3;P55011	P55011-3;P55011	Solute carrier family 12 member 2	SLC12A2
5.58829	-3.80599	Q9Y666;Q9Y666-2	Q9Y666	Solute carrier family 12 member 7	SLC12A7
NaN	Upregulated	P11169;Q8TDB8-4;Q8TDB8-2;Q8TDB8;Q8TDB8-5	P11169;Q8TDB8-4;Q8TDB8-2;Q8TDB8;Q8TDB8-5	Solute carrier family 2, facilitated glucose transporter member 3;Solute carrier family 2, facilitated glucose transporter member 14	SLC2A3;SLC2A14
4.58579	-3.77863	Q96BI1	Q96BI1	Solute carrier family 22 member 18	SLC22A18
5.08229	1.39928	Q9UNH7-2;Q9UNH7	Q9UNH7-2;Q9UNH7	Sorting nexin-6;Sorting nexin-6, N-terminally processed	SNX6
3.24131	-1.36641	Q9Y5X2	Q9Y5X2	Sorting nexin-8	SNX8
6.16793	3.42457	Q9Y5X1	Q9Y5X1	Sorting nexin-9	SNX9
6.02096	-1.885	Q9BW04-2;Q9BW04	Q9BW04-2;Q9BW04	Specifically androgen-regulated gene protein	SARG
12.5137	-1.5801	Q13813-2;Q13813;Q13813-3	Q13813-2;Q13813;Q13813-3	Spectrin alpha chain, non-erythrocytic 1	SPTAN1
12.2709	-1.56624	Q01082;Q01082-2;P11277-3;P11277;P11277-2	Q01082;Q01082-2	Spectrin beta chain, non-erythrocytic 1	SPTBN1
5.65633	-2.85127	O15020;O15020-2	O15020;O15020-2	Spectrin beta chain, non-erythrocytic 2	SPTBN2
2.62868	1.34411	Q9BVQ7;Q9BVQ7-2;Q9BVQ7-3	Q9BVQ7;Q9BVQ7-2;Q9BVQ7-3	Spermatogenesis-associated protein 5-like protein 1	SPATA5L1
6.31629	2.38918	Q86XZ4	Q86XZ4	Spermatogenesis-associated serine-rich protein 2	SPATS2
6.94531	1.83844	P19623	P19623	Spermidine synthase	SRM
4.20906	1.22498	P52788;P52788-2	P52788;P52788-2	Spermine synthase	SMS
6.53981	4.5266	P28290;P28290-2;P28290-3	P28290;P28290-2;P28290-3	Sperm-specific antigen 2	SSFA2
6.12516	1.46656	P63208;P63208-2	P63208;P63208-2	S-phase kinase-associated protein 1	SKP1
5.82397	-1.82589	Q14534	Q14534	Squalene monooxygenase	SQLE
4.88197	1.54451	P37268;P37268-5;P37268-2;P37268-4;P37268-3	P37268;P37268-5;P37268-2;P37268-4;P37268-3	Squalene synthase	FDFT1
4.35752	1.10547	P16949;P16949-2	P16949;P16949-2	Stathmin	STMN1
6.97499	1.07795	Q9UEW8-2;Q9UEW8	Q9UEW8-2;Q9UEW8	STE20/SPS1-related proline-alanine-rich protein kinase	STK39
1.57924	-1.15136	Q5K651	Q5K651	Sterile alpha motif domain-containing protein 9	SAMD9
7.45522	-1.3022	Q15738	Q15738	Sterol-4-alpha-carboxylate 3-dehydrogenase, decarboxylating	NSDHL
8.97748	-1.31152	Q99470	Q99470	Stromal cell-derived factor 2	SDF2
2.32844	1.07923	Q9HCN8	Q9HCN8	Stromal cell-derived factor 2-like protein 1	SDF2L1
3.89901	-1.38955	Q13586;Q13586-2	Q13586;Q13586-2	Stromal interaction molecule 1	STIM1
4.17135	-1.98362	Q14683	Q14683	Structural maintenance of chromosomes protein 1A	SMC1A
4.64069	-1.59507	Q9P2R7-2;Q9P2R7	Q9P2R7-2;Q9P2R7	Succinyl-CoA ligase [ADP-forming] subunit beta, mitochondrial	SUCLA2
NaN	Upregulated	P55809;Q9BYC2	P55809	Succinyl-CoA:3-ketoacid coenzyme A transferase 1, mitochondrial	OXCT1
4.40577	-1.73048	Q8NBK3-5;Q8NBK3;Q8NBK3-3;Q8NBK3-2;Q8NBK3-4	Q8NBK3-5;Q8NBK3;Q8NBK3-3;Q8NBK3-2;Q8NBK3-4	Sulfatase-modifying factor 1	SUMF1
2.37996	-2.25816	Q6ZRP7	Q6ZRP7	Sulfhydryl oxidase 2	QSOX2
12.1842	-1.77189	Q9Y6N5	Q9Y6N5	Sulfide:quinone oxidoreductase, mitochondrial	SQRDL
5.49578	2.39378	P0DMN0;P0DMM9;P0DMM9-3;P0DMM9-2	P0DMN0;P0DMM9;P0DMM9-3;P0DMM9-2	Sulfotransferase 1A4;Sulfotransferase 1A3	SULT1A4;SULT1A3
3.75333	1.10093	P63279	P63279	SUMO-conjugating enzyme UBC9	UBE2I
5.03492	1.34431	P00441	P00441	Superoxide dismutase [Cu-Zn]	SOD1
1.71828	-1.83177	O95425-2;O95425-4;O95425-3;O95425	O95425-2;O95425-4;O95425-3;O95425	Supervillin	SVIL
7.26719	1.09092	Q9Y2Z0;Q9Y2Z0-2	Q9Y2Z0;Q9Y2Z0-2	Suppressor of G2 allele of SKP1 homolog	SUGT1
5.14886	1.03029	Q16637-4;Q16637-2;Q16637-3;Q16637	Q16637-4;Q16637-2;Q16637-3;Q16637	Survival motor neuron protein	SMN1
7.40753	1.64537	Q99536;Q99536-3;Q99536-2	Q99536;Q99536-3	Synaptic vesicle membrane protein VAT-1 homolog	VAT1
7.53829	-1.37155	O00161;O00161-2	O00161;O00161-2	Synaptosomal-associated protein 23	SNAP23
4.42279	-1.36422	O14662-2;O14662-4;O14662-5;O14662;O14662-6;O14662-3	O14662-2;O14662-4;O14662-5;O14662;O14662-6;O14662-3	Syntaxin-16	STX16
4.12798	-1.93289	Q12846-2;Q12846	Q12846-2;Q12846	Syntaxin-4	STX4
3.20829	-1.35206	Q13190-2;Q13190;Q13190-3;Q13190-4	Q13190-2;Q13190;Q13190-3;Q13190-4	Syntaxin-5	STX5
7.60314	-1.58788	O00560;O00560-2;O00560-3	O00560;O00560-2;O00560-3	Syntenin-1	SDCBP
3.35563	-1.55742	Q9ULW0;Q9ULW0-2	Q9ULW0;Q9ULW0-2	Targeting protein for Xklp2	TPX2
3.23522	1.61624	O60343-2;O60343-3;O60343;O60343-4;O60343-5	O60343-2;O60343-3;O60343	TBC1 domain family member 4	TBC1D4
NaN	Downregulated	Q8TB96	Q8TB96	T-cell immunomodulatory protein	ITFG1
9.87281	1.44495	P17987	P17987	T-complex protein 1 subunit alpha	TCP1
10.2957	1.51727	P78371;P78371-2	P78371;P78371-2	T-complex protein 1 subunit beta	CCT2
10.2321	1.39791	P50991;P50991-2	P50991;P50991-2	T-complex protein 1 subunit delta	CCT4
10.8403	1.32458	P48643;P48643-2	P48643;P48643-2	T-complex protein 1 subunit epsilon	CCT5
9.28233	1.4997	Q99832;Q99832-3;Q99832-4;Q99832-2	Q99832;Q99832-3;Q99832-4;Q99832-2	T-complex protein 1 subunit eta	CCT7
10.5704	1.53031	P49368;P49368-2	P49368;P49368-2	T-complex protein 1 subunit gamma	CCT3
9.39773	1.51673	P50990;P50990-2;P50990-3	P50990;P50990-2;P50990-3	T-complex protein 1 subunit theta	CCT8
9.65427	1.33764	P40227;P40227-2;Q92526-2;Q92526-3;Q92526	P40227;P40227-2	T-complex protein 1 subunit zeta	CCT6A
NaN	Upregulated	Q9Y4R8	Q9Y4R8	Telomere length regulation protein TEL2 homolog	TELO2
1.93649	-1.51972	Q5UIP0-2;Q5UIP0	Q5UIP0-2;Q5UIP0	Telomere-associated protein RIF1	RIF1
5.20422	1.76172	P52888	P52888	Thimet oligopeptidase	THOP1
3.45654	1.87754	Q9BRA2	Q9BRA2	Thioredoxin domain-containing protein 17	TXNDC17
4.17337	-2.65501	Q9NNW7-2;Q9NNW7;Q9NNW7-3;Q9NNW7-4	Q9NNW7-2;Q9NNW7;Q9NNW7-3	Thioredoxin reductase 2, mitochondrial	TXNRD2
8.66147	-4.21431	Q16762	Q16762	Thiosulfate sulfurtransferase	TST
7.67589	-2.06944	Q96FV9;Q96FV9-2	Q96FV9	THO complex subunit 1	THOC1
7.72902	-1.63725	Q8NI27	Q8NI27	THO complex subunit 2	THOC2
4.92134	-1.00739	Q96J01;Q96J01-2	Q96J01;Q96J01-2	THO complex subunit 3	THOC3
5.58564	-2.05196	Q13769	Q13769	THO complex subunit 5 homolog	THOC5
5.08411	-2.2265	Q86W42;Q86W42-2;Q86W42-3	Q86W42;Q86W42-2;Q86W42-3	THO complex subunit 6 homolog	THOC6
6.50404	-2.36332	Q9BW92;Q9BW92-2	Q9BW92;Q9BW92-2	Threonine--tRNA ligase, mitochondrial	TARS2
NaN	Downregulated	P24557;P24557-3;P24557-2;P24557-4	P24557;P24557-3;P24557-2;P24557-4	Thromboxane-A synthase	TBXAS1
5.39753	2.3035	Q9BV44	Q9BV44	THUMP domain-containing protein 3	THUMPD3
NaN	Upregulated	P19971;P19971-2	P19971;P19971-2	Thymidine phosphorylase	TYMP
NaN	Upregulated	Q15654	Q15654	Thyroid receptor-interacting protein 6	TRIP6
6.48674	-2.66296	Q9UDY2-3;Q9UDY2-4;Q9UDY2-6;Q9UDY2;Q9UDY2-7;Q9UDY2-5;Q9UDY2-2	Q9UDY2-3;Q9UDY2-4;Q9UDY2-6;Q9UDY2;Q9UDY2-7;Q9UDY2-5;Q9UDY2-2	Tight junction protein ZO-2	TJP2
NaN	Downregulated	P10646-2;P10646	P10646-2;P10646	Tissue factor pathway inhibitor	TFPI
4.02268	1.19916	Q6P9B6	Q6P9B6	TLD domain-containing protein 1	TLDC1
3.72184	-1.23634	Q9UGU0-2;Q9UGU0	Q9UGU0-2;Q9UGU0	Transcription factor 20	TCF20
4.75547	-1.25815	Q00059-2;Q00059	Q00059-2;Q00059	Transcription factor A, mitochondrial	TFAM
7.72829	1.45494	P20290-2;P20290	P20290-2;P20290	Transcription factor BTF3	BTF3
3.51221	-1.4424	Q96QR8	Q96QR8	Transcriptional activator protein Pur-beta	PURB
NaN	Upregulated	O75410-7;O75410-9;O75410;O75410-2;O75410-3;O75410-10;O75410-5;O75410-4;O75410-6	O75410-7;O75410-9;O75410;O75410-2;O75410-3;O75410-10;O75410-5;O75410-4;O75410-6	Transforming acidic coiled-coil-containing protein 1	TACC1
10.2469	-1.22798	P37802;P37802-2	P37802;P37802-2	Transgelin-2	TAGLN2
4.5826	1.5145	Q15631;Q15631-2	Q15631	Translin	TSN
3.8019	1.61772	Q99598	Q99598	Translin-associated protein X	TSNAX
8.01085	-1.38669	Q9UGP8	Q9UGP8	Translocation protein SEC63 homolog	SEC63
8.52061	-1.1884	P51571	P51571	Translocon-associated protein subunit delta	SSR4
4.41479	-1.73797	O15321-2;O15321	O15321-2;O15321	Transmembrane 9 superfamily member 1	TM9SF1
6.97629	-1.25035	Q99805	Q99805	Transmembrane 9 superfamily member 2	TM9SF2
5.78159	-2.98982	Q9HD45	Q9HD45	Transmembrane 9 superfamily member 3	TM9SF3
9.05439	-1.91007	Q92544	Q92544	Transmembrane 9 superfamily member 4	TM9SF4
1.92257	-2.66687	Q9UM00-1;Q9UM00-2;Q9UM00	Q9UM00-1;Q9UM00-2;Q9UM00	Transmembrane and coiled-coil domain-containing protein 1	TMCO1
3.78889	-1.13521	Q7Z7H5-3;Q7Z7H5;Q7Z7H5-2	Q7Z7H5-3;Q7Z7H5;Q7Z7H5-2	Transmembrane emp24 domain-containing protein 4	TMED4
2.10023	-1.69976	Q9H061;Q9H061-2	Q9H061;Q9H061-2	Transmembrane protein 126A	TMEM126A
4.33493	-1.49515	Q9HC07;Q9HC07-2	Q9HC07;Q9HC07-2	Transmembrane protein 165	TMEM165
5.43182	-1.25977	Q6NUQ4;Q6NUQ4-2	Q6NUQ4;Q6NUQ4-2	Transmembrane protein 214	TMEM214
NaN	Downregulated	Q0P6H9	Q0P6H9	Transmembrane protein 62	TMEM62
4.46623	-1.15874	Q96MH6	Q96MH6	Transmembrane protein 68	TMEM68
7.72019	-1.2276	P53007	P53007	Tricarboxylate transport protein, mitochondrial	SLC25A1
10.8986	1.60185	P22102;P22102-2	P22102;P22102-2	Trifunctional purine biosynthetic protein adenosine-3;Phosphoribosylamine--glycine ligase;Phosphoribosylformylglycinamidine cyclo-ligase;Phosphoribosylglycinamide formyltransferase	GART
NaN	Upregulated	Q6ZMU5	Q6ZMU5	Tripartite motif-containing protein 72	TRIM72
4.64951	-1.00125	Q5IS74;O14773;O14773-2	Q5IS74;O14773;O14773-2	Tripeptidyl-peptidase 1	TPP1
1.87991	-1.18981	Q9UJA5-3;Q9UJA5-2;Q9UJA5;Q9UJA5-4	Q9UJA5-3;Q9UJA5-2;Q9UJA5;Q9UJA5-4	tRNA (adenine(58)-N(1))-methyltransferase non-catalytic subunit TRM6	TRMT6
6.61035	4.11505	Q9NXH9-2;Q9NXH9	Q9NXH9-2;Q9NXH9	tRNA (guanine(26)-N(2))-dimethyltransferase	TRMT1
2.14487	1.07787	Q969Y2-3;Q969Y2;Q969Y2-4;Q969Y2-2	Q969Y2-3;Q969Y2;Q969Y2-4;Q969Y2-2	tRNA modification GTPase GTPBP3, mitochondrial	GTPBP3
7.35789	1.3535	Q9BVA1;Q13885	Q9BVA1;Q13885	Tubulin beta-2B chain;Tubulin beta-2A chain	TUBB2B;TUBB2A
5.5249	2.91772	Q13509;Q13509-2	Q13509;Q13509-2	Tubulin beta-3 chain	TUBB3
7.42143	1.07969	Q14166	Q14166	Tubulin--tyrosine ligase-like protein 12	TTLL12
NaN	Upregulated	O95407	O95407	Tumor necrosis factor receptor superfamily member 6B	TNFRSF6B
7.62183	1.19331	P55327-2;P55327-4;P55327;P55327-7;P55327-5;P55327-6;P55327-3;P55327-8	P55327-2;P55327-4;P55327;P55327-7;P55327-5;P55327-6;P55327-3;P55327-8	Tumor protein D52	TPD52
5.54098	1.22397	O43399-2;O43399-4;O43399;O43399-3;O43399-5;O43399-7;O43399-6	O43399-2;O43399-4;O43399;O43399-3;O43399-5;O43399-7;O43399-6	Tumor protein D54	TPD52L2
7.75081	1.96357	Q6IBS0;Q9NR96-4	Q6IBS0	Twinfilin-2	TWF2
NaN	Upregulated	Q86YV5	Q86YV5	Tyrosine-protein kinase SgK223	SGK223
10.323	-1.02099	P18031	P18031	Tyrosine-protein phosphatase non-receptor type 1	PTPN1
6.93056	1.46852	Q06124-1;Q06124;Q06124-3	Q06124-1;Q06124;Q06124-3	Tyrosine-protein phosphatase non-receptor type 11	PTPN11
1.60425	1.07884	O43818	O43818	U3 small nucleolar RNA-interacting protein 2	RRP9
3.491	1.01985	Q9Y4Z0	Q9Y4Z0	U6 snRNA-associated Sm-like protein LSm4	LSM4
NaN	Downregulated	Q9NPG3-2;Q9NPG3	Q9NPG3-2;Q9NPG3	Ubinuclein-1	UBN1
4.88988	1.28458	Q9UHD9	Q9UHD9	Ubiquilin-2	UBQLN2
7.20363	-1.28731	Q9BRT2	Q9BRT2	Ubiquinol-cytochrome-c reductase complex assembly factor 2	UQCC2
4.2936	1.86529	Q14694-2;Q14694;Q14694-3	Q14694-2;Q14694;Q14694-3	Ubiquitin carboxyl-terminal hydrolase 10	USP10
5.22007	3.15143	O94966-4;O94966-3;O94966-7;O94966-6;O94966;O94966-5;O94966-2	O94966-4;O94966-3;O94966-7;O94966-6;O94966;O94966-5	Ubiquitin carboxyl-terminal hydrolase 19	USP19
4.02262	1.40466	Q92890-3;Q92890;Q92890-1	Q92890-3;Q92890;Q92890-1	Ubiquitin fusion degradation protein 1 homolog	UFD1L
5.48688	2.79548	Q5T6F2;Q5T6F2-2	Q5T6F2	Ubiquitin-associated protein 2	UBAP2
8.45359	1.10393	Q14157-4;Q14157-1;Q14157-3;Q14157;Q14157-5	Q14157-4;Q14157-1;Q14157-3;Q14157;Q14157-5	Ubiquitin-associated protein 2-like	UBAP2L
4.94814	1.18345	O00762;O00762-2;O00762-3;O00762-4	O00762;O00762-2	Ubiquitin-conjugating enzyme E2 C	UBE2C
7.25208	1.35224	P61086;P61086-2;P61086-3	P61086;P61086-2;P61086-3	Ubiquitin-conjugating enzyme E2 K	UBE2K
9.51065	2.93571	P68036;P68036-3;P68036-2;A0A1B0GUS4	P68036;P68036-3;P68036-2;A0A1B0GUS4	Ubiquitin-conjugating enzyme E2 L3	UBE2L3
5.10864	1.42031	A0AVT1;A0AVT1-2;A0AVT1-4;A0AVT1-3	A0AVT1;A0AVT1-2	Ubiquitin-like modifier-activating enzyme 6	UBA6
9.41169	-1.38059	O60701;O60701-2;O60701-3	O60701;O60701-2;O60701-3	UDP-glucose 6-dehydrogenase	UGDH
3.41373	-1.37586	Q9NYU1;Q9NYU1-2	Q9NYU1	UDP-glucose:glycoprotein glucosyltransferase 2	UGGT2
4.96942	-1.61586	Q9BRJ6	Q9BRJ6	Uncharacterized protein C7orf50	C7orf50
7.70461	1.58678	O43795-2;O43795	O43795-2;O43795	Unconventional myosin-Ib	MYO1B
4.08087	-1.47114	O94832;B0I1T2-2;B0I1T2-3;B0I1T2-4;B0I1T2	O94832	Unconventional myosin-Id	MYO1D
2.6411	1.66846	Q12965	Q12965	Unconventional myosin-Ie	MYO1E
4.32452	-1.09669	Q9ULV0;Q9ULV0-2;Q9ULV0-3	Q9ULV0	Unconventional myosin-Vb	MYO5B
5.61647	-1.81115	Q96H55-3;Q96H55;Q96H55-4;Q96H55-2	Q96H55-3;Q96H55;Q96H55-4;Q96H55-2	Unconventional myosin-XIX	MYO19
7.62261	-1.92665	Q92614-4;Q92614;Q92614-3;Q92614-2;Q92614-5	Q92614-4;Q92614;Q92614-3;Q92614-2;Q92614-5	Unconventional myosin-XVIIIa	MYO18A
4.51236	2.61848	Q7Z3D6-3;Q7Z3D6;Q7Z3D6-2;Q7Z3D6-5;Q7Z3D6-4;Q7Z3D6-6	Q7Z3D6-3;Q7Z3D6;Q7Z3D6-2;Q7Z3D6-5;Q7Z3D6-4	UPF0317 protein C14orf159, mitochondrial	C14orf159
NaN	Upregulated	Q49AR2;Q49AR2-2	Q49AR2;Q49AR2-2	UPF0489 protein C5orf22	C5orf22
5.71961	1.26206	Q9GZN8;Q9GZN8-2	Q9GZN8;Q9GZN8-2	UPF0687 protein C20orf27	C20orf27
7.5908	2.53358	Q9UN37	Q9UN37	Vacuolar protein sorting-associated protein 4A	VPS4A
4.38079	1.53581	Q9NP79;Q9NP79-2	Q9NP79;Q9NP79-2	Vacuolar protein sorting-associated protein VTA1 homolog	VTA1
5.89658	-1.89516	O14975;O14975-2	O14975;O14975-2	Very long-chain acyl-CoA synthetase	SLC27A2
3.60867	-1.00989	Q9P035;Q9P035-2	Q9P035;Q9P035-2	Very-long-chain (3R)-3-hydroxyacyl-CoA dehydratase 3	HACD3
7.42757	-1.19528	Q53GQ0;Q53GQ0-2	Q53GQ0	Very-long-chain 3-oxoacyl-CoA reductase	HSD17B12
6.9227	-1.05717	O75396	O75396	Vesicle-trafficking protein SEC22b	SEC22B
NaN	Downregulated	P09327;P09327-2;O75366-2;O75366	P09327;P09327-2	Villin-1	VIL1
9.10814	1.24355	P18206;P18206-2;P18206-3	P18206;P18206-2	Vinculin	VCL
NaN	Upregulated	P62760	P62760	Visinin-like protein 1	VSNL1
1.94693	-1.69706	Q8N0U8;Q8N0U8-2	Q8N0U8	Vitamin K epoxide reductase complex subunit 1-like protein 1	VKORC1L1
4.48367	-1.78132	P38435;P38435-2	P38435;P38435-2	Vitamin K-dependent gamma-carboxylase	GGCX
NaN	Downregulated	P07225	P07225	Vitamin K-dependent protein S	PROS1
9.03015	1.54564	Q9Y277;Q9Y277-2	Q9Y277;Q9Y277-2	Voltage-dependent anion-selective channel protein 3	VDAC3
9.77133	-2.36946	A3KMH1;A3KMH1-3;A3KMH1-2	A3KMH1;A3KMH1-3;A3KMH1-2	von Willebrand factor A domain-containing protein 8	VWA8
NaN	Downregulated	Q96IQ7;Q96IQ7-2	Q96IQ7;Q96IQ7-2	V-set and immunoglobulin domain-containing protein 2	VSIG2
7.38755	-3.17121	Q13488;Q13488-2	Q13488;Q13488-2	V-type proton ATPase 116 kDa subunit a isoform 3	TCIRG1
NaN	Downregulated	P15313	P15313	V-type proton ATPase subunit B, kidney isoform	ATP6V1B1
5.96322	-1.22598	Q15904	Q15904	V-type proton ATPase subunit S1	ATP6AP1
2.07554	1.20177	Q9Y4P8-3;Q9Y4P8-2;Q9Y4P8-5;Q9Y4P8-6;Q9Y4P8-4;Q9Y4P8	Q9Y4P8-3;Q9Y4P8-2;Q9Y4P8-5;Q9Y4P8-6;Q9Y4P8-4;Q9Y4P8	WD repeat domain phosphoinositide-interacting protein 2	WIPI2
7.90357	-3.24684	O76024	O76024	Wolframin	WFS1
1.64612	-1.52751	Q86VM9-2;Q86VM9	Q86VM9-2;Q86VM9	Zinc finger CCCH domain-containing protein 18	ZC3H18
NaN	Downregulated	Q9UBW7;Q9UBW7-2	Q9UBW7	Zinc finger MYM-type protein 2	ZMYM2
6.81109	1.86123	Q9BQ52;Q9BQ52-4;Q9BQ52-3;Q9BQ52-2	Q9BQ52;Q9BQ52-4;Q9BQ52-3	Zinc phosphodiesterase ELAC protein 2	ELAC2
5.41186	-1.19474	Q8NEW0	Q8NEW0	Zinc transporter 7	SLC30A7
